# Genome assembly of the A-group *Wolbachia* in *Nasonia oneida* and phylogenomic analysis of *Wolbachia* strains reveals patterns of genome evolution and lateral gene transfer

Xiaozhu Wang<sup>1</sup>, Xiao Xiong<sup>1,2</sup>, Wenqi Cao<sup>1</sup>, Chao Zhang<sup>2</sup>, John H. Werren<sup>3</sup> and Xu Wang<sup>1,4,5†</sup>

<sup>1</sup>*Department of Pathobiology, Auburn University, Auburn, AL 36849*

<sup>2</sup>*Translational Medical Center for Stem Cell Therapy and Institute for Regenerative Medicine, Shanghai East Hospital, Shanghai Key Laboratory of Signaling and Disease Research, School of Life Sciences and Technology, Tongji University, Shanghai, China*

<sup>3</sup>*Department of Biology, University of Rochester, Rochester, NY 14627*

<sup>4</sup>*Alabama Agricultural Experiment Station, Auburn University, Auburn, AL 36849*

<sup>5</sup>*HudsonAlpha Institute for Biotechnology, Huntsville, AL 35806*

†corresponding author:

Xu Wang

Phone: (334) 844-7511

Fax: (334) 844-2618

E-mail: [xzw0070@auburn.edu](mailto:xzw0070@auburn.edu)

ORCID: 0000-0002-7594-5004

# Abstract

*Wolbachia* are obligate intracellular bacteria which commonly infect various nematode and arthropod species. Based on depth differences, we assembled the genome of *Wolbachia* in the parasitoid jewel wasp species *Nasonia oneida* (wOne), using 10X Genomics Chromium linked-read technology. The final draft assembly consists of 1,293,406 bp in 47 scaffolds with 1,114 coding genes and 97.01% genome completeness assessed by checkM. wOne is the A1 strain previously reported in *N. oneida*, and pyrosequencing confirms that the wasp strain lacks A2 and B types, which were likely lost during laboratory culturing. Polymorphisms identified in the wOneA1 genome have elevated read depths, indicating recent gene duplications rather than strain variation. These polymorphisms are enriched in nonsynonymous changes in 27 coding genes, including phase baseplate assembly proteins and transporter activity related genes. wOneA1 is more closely grouped with A-*Wolbachia* in the *Drosophila simulans* (wHa) than A-*Wolbachia* found in wasps. Genome variation was next evaluated in 34 published *Wolbachia* genomes for 211 single ortholog genes, and revealed six supergroup discordant trees, indicating recombination events not only between A and B supergroups, but also between A and E supergroups. Comparisons of strain divergence using the five genes of the Multi Locus Strain Typing (MLST) system show a high correlation ( $\rho=0.98$ ) between MLST and whole genome divergences, indicating that MLST is a reliable method for identifying related strains when whole genome data are not available. Assembling bacterial genomes from host genome projects can provide an effective method for sequencing *Wolbachia* genomes and characterizing their diversity.

## Author Summary

More than half of the arthropod species are infected by the obligated intracellular bacteria *Wolbachia*. As one of the most widespread parasitic microbes, *Wolbachia* mediate important biological processes such as cytoplasmic incompatibility and lateral gene transfer in insects. Their evolutionary relationship has been characterized using five protein-coding and 16S rRNA genes. In this work, we identified 211 conserved single copy genes in 34 genome sequenced *Wolbachia* strains, and we discovered that they maintain the supergroup relationship classified previously based on selected genes. We constructed phylogenetic trees for individual genes and found only six genes display discordant tree structure between supergroups, due to lateral gene transfer and homologous recombination events. But these events are not common (3%) in *Wolbachia* genomes, at least in these conserved single copy genes. In addition to known lateral gene transfer events between A and B supergroups, we identified transfers between A and E supergroups for the first time. Selective maintenance of such transfers suggests possible roles in *Wolbachia* infection related functions. We also found enriched nonsynonymous polymorphisms in *Nasonia oneida* *Wolbachia* genome, and their differences are more likely to result from gene duplications within the strain, rather than strain variation within the parasitoid.

## Background

*Wolbachia*, alphaproteobacterial endosymbionts, are widespread and common in arthropods and filarial nematodes, either as reproductive parasites or mutualists (Fenn and Blaxter 2006; Werren 1997; Werren, et al. 2008). It is estimated that half or more of arthropods are infected with *Wolbachia* (Hilgenboecker, et al. 2008; Zug and Hammerstein 2012), possibly representing a dynamic equilibrium between gain and loss on a global scale (Bailly-Bechet, et al. 2017; Klopstein, et al. 2018; Werren and Windsor 2000). The widespread distribution of *Wolbachia* is due to horizontal movement of the bacteria between arthropod species, although the routine mode of transmission of these bacteria is vertical through the egg cytoplasm. *Wolbachia* have been found to move across species boundaries through horizontal transfer and by hybrid introgression (Raychoudhury, et al. 2009). The *Wolbachia*-host interaction generally spans a range from reproductive parasitism to mutualism. *Wolbachia* can alter the host reproduction to enhance their own transmission in different ways, such as feminization of genetic males, male-killing, parthenogenetic induction, and cytoplasmic incompatibility (Stouthamer, et al. 1999; Werren, et al. 2008). *Wolbachia pipientis* have been divided into eight supergroups (A-H) based on 16S ribosomal RNA sequences and other sequence information, including six supergroups (A,B and E-H) primarily identified in arthropods and two supergroups (C and D) commonly found in filarial nematodes (Werren, et al. 2008). Supergroup G is now considered as a recombinant of supergroups A and B (Baldo and Werren 2007). A multi-locus strain typing (MLST) system based on five house-keeping genes, (*coxA*, *gatB*, *hcpA*, *ftsZ* and *fbpA*) has been developed for *Wolbachia* (Baldo, et al. 2006b), and is widely used for strain typing and to characterize strain variation within *Wolbachia*. However, the increasing number of genome

sequences for *Wolbachia* allows for more detailed characterization of their diversity, including inter-strain recombination events.

The jewel wasp genus of *Nasonia* has been an excellent model for *Wolbachia* research (Bordenstein, et al. 2001; Bordenstein, et al. 2003; Breeuwer and Werren 1993; Perrot-Minnot, et al. 1996; Raychoudhury, et al. 2009). Eleven *Wolbachia* have so far been identified in the four species of *Nasonia*, including two (*wVitA* and *wVitB*) in *N. vitripennis* (NV), three (*wNgirA1*, *wNgirA2* and *wNgirB*) in *N. giraulti* (NG), three (*wOneA1*, *wOneA2* and *wOneB*) in *N. oneida* (NO), and three (*wNlonA*, *wNlonB1* and *wNlonB2*) in *N. longicornis* (NL) (Raychoudhury, et al. 2009). These are often maintained as multiple infections within individual wasps of each species. Although these strains belong to two major supergroups (A and B), the *Wolbachia* of each supergroup are not monophyletic, but rather have diverse evolutionary origins, indicating horizontal transfers from divergent host species (Raychoudhury, et al. 2009). The exception to this is the B *Wolbachia* found in *N. longicornis*, *N. giraulti* and *N. oneida*, which are closely related and derived from a common ancestor many of the *Wolbachia* are not monophyletic (which would suggest cospeciation with their hosts).

Genomic studies of *Wolbachia* blossomed in the recent years since the first complete genome of the A-*Wolbachia* parasite of *Drosophila melanogaster* (*wMel*) published in 2004 (Wu, et al. 2004), followed by the complete genome of D-*Wolbachia* (*wBm*) in nematode *Brugia malayi* in 2005 (Foster, et al. 2005). A list of sequenced whole genomes of *Wolbachia* is summarized in Table S1. *Wolbachia* genomes are small with a range between 0.9-1.7 Mb. In general, most of the nematode-associated *Wolbachia* have smaller genomes but retain intact metabolic pathways and immunology pathways, which contribute to the mutualistic relationship with the hosts (Darby, et al. 2012; Foster, et al. 2005; Wu, et al. 2004). However, arthropod-associated

*Wolbachia* contain more prophage and ankyrin repeat encoding (ANK) gene components, which may reflect their more frequent parasitic lifestyle (Klasson, et al. 2008; Pan, et al. 2008). Furthermore, many studies have claimed lateral gene transfer (LGT) across strains and supergroups, which may be mediated by bacteriophage and lead to the mosaic genomes of *Wolbachia* (Duplouy, et al. 2013; Kent, et al. 2011; Klasson, et al. 2009). Although co-infection of different strains and LGT exist in the same arthropod host, the supergroups may remain genetically distinct clades (Ellegaard, et al. 2013). Another key feature of most *Wolbachia* genomes is the abundance of mobile and repetitive elements, which are different from most *Rickettsiales* (Werren, et al. 2008). Noticeably, the proportion of repetitive elements in genome vary widely among *Wolbachia* strains. For example, 22% of the *w*Ri genome is comprised of repetitive sequences (Klasson, et al. 2009), compared to only 5% in the *w*Bm genome (Foster, et al. 2005). In the jewel wasp (*Nasonia*) species, only two *Wolbachia* strains have been sequenced (*w*VitA (Newton, et al. 2016) and *w*VitB (Kent, et al. 2011)), both from NV. Genome sequence of additional *Wolbachia* strains in the *Nasonia* species complex will facilitate the comparative genomic and evolutionary analyses of this model system.

Because of its endosymbiotic nature, multiple different *Wolbachia* strains can be present in the same host cells, allowing the potential for homologous recombination between strains (Jiggins 2002; Jiggins, et al. 2001). Recombination events in *Wolbachia* have been discovered in *Wsp* (Werren and Bartos 2001) and other genes in Crustaceans (Verne, et al. 2007), mites (Ros, et al. 2012) and insect species including wasps (Baldo, et al. 2006a; Baldo, et al. 2005; Werren and Bartos 2001), ants (Reuter and Keller 2003) and butterflies (Ilinsky and Kosterin 2017), and some of this recombination appears to be phage mediated (Lindsey, et al. 2018). There is no evidence of inter-strain recombination in filarial nematode *Wolbachia* strains (Foster, et al.

2011). Most of the previous research on recombination has focused on five MLST genes, *Wollbachia* surface protein (*wsp*), and 16S, or for a few genomes from the A and B supergroups. Therefore, whole-genome analyses in a large number of *Wolbachia* strains of all supergroups are needed to identify additional homologous recombination and LGT events among *Wolbachia* strains. In this study, we assembled the *Wolbachia* strain in *N. oneida*, performed phylogenomic analyses on 34 genome sequenced *Wolbachia* strains, and analyzed the individual gene tree to identify potential recombination events at the genome level. Relatively low frequencies of intergroup gene transfers were found (6 discordant trees among 211 core single copy genes examined), indicating a general genetic cohesiveness for the A and B supergroups.

## Results

### Assembly of *Wolbachia* genome in the 10X Genomics Chromium sequencing of *N. oneida*.

This *Wolbachia* project emerged from an original effort to sequence the genome of the parasitoid wasp *N. oneida* (Raychoudhury, et al. 2010). The *de novo* assembly of the parasitoid wasp NO genome was performed using linked reads generated by 10X Genomics Chromium technology with Supernova 2.1.1 assembler (Weisenfeld, et al. 2017). *Wolbachia* scaffolds were identified and separated from the NO genome assembly using a custom bioinformatics pipeline (Figure 1 and 2A). NO scaffolds were BLATed against bacterial genome database (Kent 2002), and we identified *wOne* scaffolds based on the median coverage, GC-content and sequence identity to known *Wolbachia* sequences (Figure 2; see Methods). *wOne* scaffolds have an median genome coverage of 59.38X, which is significantly lower compared to 713.59X for the NO genomic scaffolds ( $P$ -value  $< 2.2 \times 10^{-16}$ , Figure 2B). The mitochondrial scaffold coverage is over 20,000X (Figure 2B). In addition, there is a significant shift in GC-content for the *Wolbachia* genome (35.44%) compared to the host genome average (38.07%,  $P$ -value  $= 2.4 \times 10^{-9}$ , Figure 2C). The sufficient differences in coverage and GC-content among host genome, host mitochondrial genome and the *Wolbachia* genome allow clear separation of the *wOne* scaffolds.

The *wOne* draft genome consists of 1,293,406 nucleotides with 35.44% GC-content (Table 1). This assembly has a total of 47 scaffolds ranging in length from 1,108 to 241,132 bps with a scaffold N50 of 128.97 Kb. A total of 1,114 proteins were annotated in the *wOne* genome including rRNAs 5S, 16S and 23S and tRNAs. The number of contigs and scaffolds are fewer than *wVitA* and *wVitB*, and the contig and scaffold N50s are longer (Table 1). The genome completeness is 97.01% accessed by and checkM, which is comparable with *wVitA* and *wVitB*,



suggesting high assembly quality. *wVitA* and *wVitB* have slightly higher completeness, but at a cost of 1-2% of contamination (Table 1). The BUSCO completeness is 86.5%, which is typical for complete *Wolbachia* genomes (Sinha, et al. 2019). The 80% of coding genes from *wVitA*, the closest sequenced *Wolbachia* strain in *Nasonia*, were present in *wOne* assembly (Figure 3D).

### **Comparative genomic analysis of *Wolbachia* strains in *Nasonia* species.**

Comparisons of the five MLST genes revealed that the sequenced *Wolbachia* genome is from the strain *wOneA1* (Raychoudhury et al 2008). Pairwise alignments were performed to two *Wolbachia* genomes isolated from *N. vitripennis* (*wVitA* and *wVitB*; see Materials and Methods). The assembled genome size for *wOneA1* is 14% larger than *wVitB* and 6% larger than *wVitA*. The total number of proteins is similar to the *wVitA* and *wVitB* genomes (Table 1). A dot plot revealed a better colinear relationship between *wOneA1* and *wVitA*, with only a small number of rearrangements around the origin (Figure 3A). A total of 992,405 bps of *wOne* genome were aligned *wVitA* genome (covering 81.89%) with an average identity of 96.16%, including 681,482 bps matched in the same orientation and 310,923 bps matched in the reverse orientation. The top 5 longest scaffolds in the *wOne* genome (SCAFFOLD1, 2, 3, 4, 5) were aligned to 54.30% *wVitA* genome with an average identity of 96.93%, indicating the high contiguity of *wOne* genome assembly. However, when comparing *wOneA1* and *wVitA* genomes with *wVitB* genome respectively, significantly more genome rearrangements and inversions were observed (Figure 3B and C). This is not surprising as *wVitB* belongs to a different supergroup. A total of 671,104 bps of *wOneA1* genome were aligned *wVitB* genome, including 348,372 bps matched in the same orientation and 322,732 bps matched in the reverse orientation.

When comparing the gene contents of these *Wolbachia* strains, a total of 645 genes were shared among genomes of *wOne*, *wVitA* and *wVitB*; 212 more genes were shared between the

*wOneA1* and *wVitA* genomes but not with *wVitB* genome (Figure 3D). Among the 210 *wOneA1*-specific genes, a large fraction belongs to hypothetical protein (N=173) and transposon-related (N=22) genes. Regarding to insertion element (IS), the *wOneA1* genome contains similar numbers of IS elements when compared to the genomes of *wVitA* and *wVitB* (Table 2). Although *wVitA* and *wVitB* infect the same host NV and *wOneA1* infect a different host NO, the gene content of *wVitA* is closer to that of *wOneA1* than *wVitB*, as expected by their supergroup affiliations and indicating that there is no rampant recombination between the *wVitA* and *wVitB* at genome-wide level.

# **Phylogenomic analysis of 34 *Wolbachia* genomes revealed the evolutionary relationship and potential recombination events among strains**

We compared *wOneA1* to 33 other sequenced *Wolbachia* genomes (Table S1), which include 15 A-group and 12 B-group strains from diverse host species. Single-gene ortholog clusters were generated using the procedure described in the Methods, and 211 single-gene ortholog clusters (listed in Supplemental Data S1) were identified that are shared between *wOneA1* and the 33 other *Wolbachia* genomes. This is a smaller set than the 496 *Wolbachia* gene orthologs detected in (Lindsey, et al. 2016) for 16 *Wolbachia* strains, but ours includes a larger strain set (34 *Wolbachia* strains) and we restricted our analysis to single copy orthologs across the genomes. Based on the coding sequences of this core gene set, a Maximum Likelihood (ML) phylogenetic tree of 34 *Wolbachia* genomes confirmed the separation of different supergroups A (*wSuzi*, *wSpc*, *wRi*, *wHa*, *wAu*, *wMel*, *wMelPop*, *wGmm*, *wUni*, *wDacA*, *wNfe*, *wNpa*, *wNfla*, *wNleu*, *wVitA*, *wOneA*), B (*wCon*, *wAlbB*, *wStri*, *wDi*, *wNo*, *wTpre*, *wDacB*, *wVitB*, *Ob\_Wba*, *wBol1*, *wPip\_Mol*, *wPip*), C (*wOo*, *wOv*), D (*wBm*, *wWb*), E (*wFol*) and F (*wCle*) with 100% bootstrap support (Figure 4, Supplemental Data S2 and S3). Noticeably, *wOneA1* is more closely related to

a subset of A-*Wolbachia* found in *Drosophila* (*wHa*, *wRi*, *wSpc* and *wSuzi*) than to *wVitA* and *wUni* in parasitoid wasps. This pattern was previously observed using MLST by five genes in *Wolbachia* (Raychoudhury, et al. 2009), but is now supported by a much larger data set. Our genomic analyses also supported extensive horizontal movement of *Wolbachia* strains between divergent host species. A ML phylogenetic tree of protein sequences from these core genes was also constructed with RAxML. The protein ML phylogenetic tree is highly similar to the coding sequence ML tree with some minor differences (Figure S1, Supplemental Data S4 and S5).

We next examined genomes for potential lateral gene transfers among the core gene set. Single gene trees of coding sequences from the core gene set were constructed to check for supergroup level consistency. For 205 of the 211 trees, the separation among the A to F supergroups was consistent, with slight rearrangement for some *Wolbachia* strains within each supergroup. However, six trees are mixed among different supergroups, presumably due to lateral gene transfer or recombination events between strains (Figures 5-8, Supplemental Data S6-S11); the genes are hypothetical protein WONE\_01840, cytochrome c oxidase subunit II (*coxB*), hypothetical protein WONE\_04820, NADH-quinone oxidoreductase subunit C (*nuoC*), molecular chaperone (*DnaK*), and arginine-tRNA ligase (*argS*).

Among these six single gene trees, one tree showed evidence of a recombination event between B-*Wolbachia* and A/D-*Wolbachia* in gene *argS* (Figure 8, Supplemental Data S11). Four trees revealed some mix groupings between A-*Wolbachia* and B-*Wolbachia* in hypothetical protein WONE\_01840 (Figure 5, Supplemental Data S6), *coxB* (Figure 6A, Supplemental Data S7), hypothetical protein WONE\_04820 (Figure 6B, Supplemental Data S8), and *nuoC* (Figure 7A, Supplemental Data S9), which suggest a lateral transfer. Also, three trees grouped A-*Wolbachia* and the E-*Wolbachia* *wFol* together, including *wFol* clustered with A-*Wolbachia* in

coxB (Figure 6A) and WONE\_04820 (Figure 6B), and A-*Wolbachia* wDacA clustered with wFol in DnaK (Figure 7B, Supplemental Data S10) and argS (Figure 8B). The recombination between A and B supergroups in gene coxB was reported by a previous study of 6 *Wolbachia* strains (Ellegaard, et al. 2013), and the remaining identified between-supergroup recombination events are novel findings in our study. Taken together, 97% of the single copy orthologs agree with the supergroup classification in *Wolbachia*, with a few cases of likely recombination or lateral transfer events between *Wolbachia* strains of different supergroups. The finding also indicates that these recombination events involve relatively small regions, rather than large recombination events involving many genes. The frequent gene order rearrangements observed in *Wolbachia* may make larger recombination tracks between supergroups less successful, as they are more likely to involve vital gene losses due to lack of synteny.

### **Phylogenetic analysis of MLST genes of *Wolbachia* in *Nasonia*.**

Previous research indicated that NO contains three *Wolbachia* strains, A1, A2 and B, which were acquired through a hybrid introgression from NG (Raychoudhury, et al. 2009). However, the genome sequence for the current *N. oneida* strain indicates presence of only one A-group strain, even though the same insect strain is present in both studies. This difference is likely due to stochastic loss of two strains during laboratory culturing. This is known to happen in *Nasonia*, particularly when the strains are passed through winter larval diapause (Perrot-Minnot, et al. 1996), which involves storage under refrigeration for up to 1.5 years after larval diapause induction. To determine which strain (A1 or A2) was identified and assembled in our study, phylogenetic analysis was conducted with all *Wolbachia* strains in *Nasonia* using the MLST gene approach (Baldo, et al. 2006b; Paraskevopoulos, et al. 2006). The phylogenetic trees were constructed for all five MLST genes (Figure 9). wOne MLST genes grouped with A1 strains of

other species. The closest branch is the corresponding *wNgirA1* ortholog for all five MLST genes, indicating that the assembled *wOne* is the strain A1. All phylogenetic trees of five MLST genes supported the conclusion that the identified *wOne* in our study belongs to the A1 strain of NO. The MLST gene sequence of *Wolbachia* in NO are the same as the corresponding one of *Wolbachia* in NG (Raychoudhury, et al. 2009). Our results are consistent with the previous findings for all five MLST genes in *wOneA1*.

# **Loss of A2 and B *Wolbachia* in the assembled *N. oneida* strain.**

To determine whether there are other *Wolbachia* strains in NO, we aligned the *wOne* sequencing reads to NG MLST genes. No reads were mapped to *wNgirB* MLST genes, suggesting the B supergroup is absent in our NO strain. For *wNgirA1* MLST genes, the average coverage is 30X which are close to the coverage of *wOne* scaffolds. *wNgirA2* MLST genes only have multiple mapped reads to both *wNgirA1* and *wNgirA2*, which is not informative to determine the existence of the A2 strain. The informative SNPs in each of MLST genes between *wNgirA1* and *wNgirA2* were further checked for read counts to ensure the inability to detect of *wOneA2*. No read count was identified for A2 allele of all MLST genes, while all A1 alleles were supported by at least 30 read counts (Table S2).

Furthermore, strain typing of *Wolbachia* was performed on NO of our study and NO genomic DNA samples that are known to be infected with all three strains (A1, A2 and B), using independent allele-specific pyrosequencing approach. An A/G SNP in the *coxA* gene was used to separate B-*Wolbachia* from A-*Wolbachia* (A allele in A1/A2-*Wolbachia* and G allele in B-*Wolbachia*, Figure S2A). In *gatB* gene, a C/T SNP can distinguish A1-*Wolbachia* allele from A2/B-*Wolbachia* (Figure S2B). The pyrosequencing results confirmed the lack of A2 and B

strains in the genome assembled NONY strain. All three *Wolbachia* infections (A1, A2 and B) were successfully identified in the CAR262L strain DNA samples (Figure S2 and Table S3).

**Single Nucleotide Polymorphisms (SNPs) likely represent gene duplications within the *wOneA1* genome are enriched in transmembrane transporter genes.**

A total of 68 high-quality SNPs was called using *wOneA1* genome alignments (Figure 10). The alternative allele frequency of these identified SNPs ranges from 0.21 to 0.62 (Figure S3). All identified SNPs were shown in the circular view of *wOne* genome (Figure 10). Read alignments for SNP positions were visualized by IGV (two examples were listed in Figure 10). For most cases, the SNPs are clustered in regions with higher (2-3 fold) coverage than the rest of the *wOneA1* genome, suggesting gene duplication might be the cause of polymorphisms in *wOne* genome (Figure 10). Among these identified SNPs, 27 were found to be located within gene regions (Table S4). They likely did not assemble as unique duplications in the genome due to sequence similarity. For instance, we identified multiple SNPs located in the region of *WONE\_08300* gene in SCAFFOLD10, which is phage-related baseplate assembly protein J (Figure 10A). Reads alignment in IGV indicated that most SNPs were linked, and we can manually assemble these reads into two homologous genes (Figure 10B and 10C). The protein sequence of the alternative assembly has 92% identity with baseplate assembly protein J. However, long read technology would be needed to resolve their status as duplications. BLAST2GO (Conesa, et al. 2005) analysis identified the transmembrane transporter activity molecular function GO term was significantly enriched (Figure S4) among genes containing SNPs.

**Concordance of MLST genes and whole genome divergence**

295 The MLST system has been variously used for strain typing of *Wolbachia*, identification of  
 296 related strains, recombination within genes (e.g. the *wsp* locus) and for phylogenetic inferences  
 297 among strains. Recently, reliability of the MLST system has been criticize (Bleidorn and Gerth  
 298 2018) as unreliable, with whole genome sequencing to be preferred. Although whole genome  
 299 data sets would always be desirable, we undertook to compare genetic divergence based the  
 300 MLST to our set of 211 genes in 34 different *Wolbachia* strains. The MLST performed very well  
 301 in both identifying closely related strains and in genetic divergence among strains compared to  
 302 the genome wide data set. The correlation coefficient ( $\rho$ ) of estimated evolutionary divergence  
 303 using core gene set and *gatB*, *fbpA*, *hcpA*, *coxA*, *ftsZ* is 0.96, 0.9, 0.97, 0.92 and 0.97,  
 304 respectively with  $P\text{-value} < 2.2 \times 10^{-16}$  (Table 3, Figure S5, Supplemental Data S12). Eventually,  
 305 whole genome data sets will supplant the MLST system. However, with over 1900 isolates in the  
 306 *Wolbachia* MLST database, this will likely take some time, and until then, MLST remains a  
 307 reliable method for identifying closely related *Wolbachia* strains and their host associations.



## Discussion

### Assembly of a prokaryotic genome in an insect species using linked reads technology.

Here we report the first *Wolbachia* genome assembled from host sequences using 10X Genomics linked-reads technology. Although many *Wolbachia* genomes have been assembled since the first *wMel* genome paper was published, the difficulty in purifying *Wolbachia* DNA from the host is still a limiting factor for the genomic studies of *Wolbachia*. Due to its intracellular lifestyle and inability of media culture, the purification of *Wolbachia* DNA from the host sample is time-consuming and sometimes impossible to obtain sufficient quantity without contamination from the host nuclear and mitochondrial genomes (Table S1). Three major methods have been applied to purify the *Wolbachia* genomic DNA from the host DNA: 1) selection of *Wolbachia* enriched materials for DNA extraction, such as host ovaries (Brelsfoard, et al. 2014) or *Wolbachia* infected cell lines (Mavingui, et al. 2012); 2) use of different filter purification methods including pulsed-field gels (Wu, et al. 2004), various gradient gels (Duploux, et al. 2013; Klasson, et al. 2009), or filter columns (Newton, et al. 2016); 3) Multiple-displacement amplification (MDA) for *Wolbachia* DNA enrichment and amplification (Ellegaard, et al. 2013; Mavingui, et al. 2012). Despite the efforts on the purification of *Wolbachia* genomic DNA, only 90% purification could be achieved. Alternative methods have been applied to solve the contamination problem. For example, in *wBm* genome project, *Wolbachia* BACs were selected from the host BAC library (Foster, et al. 2005). For the *wVitB* genome project, a high-density tiled oligonucleotide array was developed to enrich for *Wolbachia* gDNA (Kent, et al. 2011).

If no prior knowledge is available about the presence of specific microbes, sequencing without purification is preferred to identify other intracellular symbionts, as well as



characterizing bacterial species in insect gut microbiota at the whole-genome level. Other studies have extracted *Wolbachia* reads from the host whole genome sequence dataset, and then align to the reference genome of the closely related *Wolbachia* strains, or perform *de novo* assembly using the filtered reads (Chung, et al. 2017; Darby, et al. 2012; Lindsey, et al. 2016; Saha, et al. 2012; Siozios, et al. 2013). Here we perform *de novo* assembly of the host genome and *Wolbachia* genome using the 10X Genomics linked-reads technology. The *Wolbachia* DNA fragments were labeled with unique 10X barcodes, therefore they are much less likely to be misassembled into the host genome scaffolds. In this study, the microbe and the host have a 10-fold coverage difference, allowing accurate identification of the bacterial scaffolds. Therefore, the *Wolbachia* genome assembled with 10X linked reads was of good quality with no contamination of host nuclear and mitochondrial DNA. As the cost of PacBio sequencing decreases, the long-read platforms would be better for symbionts genome assembly, unless the bacterial reads are much lower than the host DNA.

### **Lateral gene transfer and recombination events among *Wolbachia* genomes.**

The phylogenomic analysis of 34 *Wolbachia* genomes in our study is the most comprehensive phylogenomic and evolutionary analysis conducted in *Wolbachia* strains to date. By including almost all available *Wolbachia* genomes in NCBI, we confirmed at the genome level that these *Wolbachia* strains group into distinct clusters (A, B, C, D, E, F supergroups) and different *Wolbachia* co-infected in the same host kept the strain boundary (Ellegaard, et al. 2013). 205 of the 211 single gene trees are consistent with the strain tree. Six genes trees have major rearrangements among *Wolbachia* groups (Figures 5-8), indicating potential recombination or lateral gene transfer events between strains. We estimated that the homologous recombination

occurred in at least 3% of the core genes in the *Wolbachia* genomes, and recombination may be one of the evolutionary forces shaping the *Wolbachia* genomes.

The six genes with distinct tree structure differences from the consensus *Wolbachia* tree include *coxB*, *nuoC*, *DnaK*, *argS*, hypothetical proteins WONE\_01840 and WONE\_04820. Gene *coxB* and *nuoC* are both involved in the electron transport chain, which might also interact with hypothetical proteins WONE\_01840 and WONE\_04820. The functions of hypothetical proteins WONE\_01840 and WONE\_04820 in *Wolbachia* are still unclear. However, the potential recombination or lateral gene transfer events identified in these genes might suggest that their maintenance could be under positive selection.

LGT events among A and B *Wolbachia* supergroups have been documented in previous studies, and we identified a few addition cases through the phylogenomic analysis among 34 sequenced genomes. Interestingly we also discovered LGT events between A and E supergroups, which was not known previously. The E group *Wolbachia* was found in Collembola, or the springtails (Czarnetzki and Tebbe 2004; Fountain and Hopkin 2005; Vandekerckhove, et al. 1999). A recent study characterized the *Wolbachia* in 11 collembolan species, and found that nearly all are E group *Wolbachia* that are monophyletic, based on phylogenetic reconstruction using MLST genes (Ma, et al. 2017). Our genome analysis of the single collembolan *Wolbachia* genome reveals a number of candidate lateral gene transfer events, including intragenic recombination in *argS* between A, B, D and E, lateral gene transfer in *coxB* and *DnaK*, and in WONE\_04820. Targeted sequencing of these genes in the additional collembolan species or additional genome sequences will help reveal the origins and directions of these lateral gene transfers. We further speculate that selective maintenance of such transfers could suggest a possible role in the *Wolbachia* function, such as parthenogenesis induction (Ma, et al. 2017).

It has been recently argued that MLST genotyping has little utility in phylogenetic analyses, and should be supplanted by genomic studies (Bleidorn and Gerth 2018). When the MLST system was developed, it was pointed out by the authors that the system would be most useful for identifying relatively closely related *Wolbachia*, due to potential recombination among more divergent strains (Baldo and Werren 2007). However, our comparison on genome sequence indicates that MLST typing is largely valid, both for supergroup identification and detection of closely related strains. Related *Wolbachia* based on MLST results are also genome-wide closely related. This suggests that, until *Wolbachia* genome sequencing becomes much less expensive and can be readily performed on single arthropods, that MLST will remain a useful tool for identification of strains, their relationships, and host affinities. Nevertheless, caution should be exercised due to some documented recombination events within MLST genes and among them (Raychoudhury, et al. 2009). Therefore, topologies should be compared among genes for evidence of discordance, rather than simply relying of phylogenetic reconstructions of concatenated sequences.

### **Loss of A2 and B *Wolbachia* in *N. oneida* lab strains**

The whole genome alignments between *wOne* and *wVitA* (Figure 3) and the phylogenetic analysis of MLST genes (Figure 9) indicated the identified strain in our study is belong to A1 supergroup. The results indicate either A2 and B are present in an extremely low level so that they cannot be detected at the current sequencing coverage, or their density is much less in our studied male NO adult samples. Subsequent allele-specific pyrosequencing validation experiments confirmed the absence of A2 and B-type *Wolbachia* infections. In NO DNA samples from a recently collected field strain, we estimate that A1 is the dominate strain and accounts for 55% of the total infection, 40% of the infection came from the B strain and only 5%

from A2 strain (Figure S2). The absence of A2 and B *Wolbachia* in the lab NO strain is likely due to stochastic loss during laboratory maintenance and diapause.

# **Evolution of the *Wolbachia* genome in the *Nasonia* genus.**

The draft genome of *wOneA1* is comprised of 47 scaffolds with a total length of 1.29 Gb. The total size of *wOne* draft genome is relatively longer when comparing to the other two *Nasonia*-associated *Wolbachia* *wVitA* and *wVitB*. Most of the genomic regions in *wOneA1* draft genome aligned well with their corresponding regions in *wVitA* with several rearrangements, indicating syntenic conservation between these two strains (Figure 3A). However, there are more structural differences between A-*Wolbachia* and B-*Wolbachia*, which were supported by the whole genome alignments between A-*Wolbachia* (*wOne* and *wVitA*) and B-*Wolbachia* *wVitB* (Figure 3B and C). The same pattern was observed when comparing gene contents among these three *Wolbachia* in *Nasonia*, *wOneA1* and *wVitA* shared more orthologous genes (Figure 3D). The results indicate that A and B *Wolbachia* retain their genetic differences even when they infect the same host, which suggests that recombination among them is not common, with the exception of phage related genes (Bordenstein and Wernegreen 2004).

We have sufficient sequence coverage in *wOne* genome to identify segregating SNPs, but all the candidate SNPs are located in regions with elevated sequencing depth (Figure 10), suggesting they are fixed differences in recently duplicated genes with multiple copies rather than segregating SNPs. This is consistent with the severe bottleneck due to the maternal transmission of *Wolbachia* through the egg, which is extremely hard to maintain segregating SNPs through balancing selection. These potential newly duplicated genes are enriched for transmembrane transporter function. Due to the intercellular lifestyle, the membrane proteins are critical for

420 *Wolbachia* infection, nutrient uptake and other interactions with the host cells. These duplication  
421 events may provide advantage over the A2 and the B strains.

422

## Methods

### Sample collection, genomic DNA extraction, 10X Genomic library preparation and genome sequencing.

Genomic DNA sample was extracted from 24-hour male adults of the *N. oneida* NONY strain. MagAttract HMW DNA Mini Kit (Qiagen, MD) was used to isolate high molecular weight genomic DNA. The quality of extracted gDNA was checked on a Qubit 3.0 Fluorometer (Thermo Fisher Scientific, USA). The size distribution of the extracted gDNA was accessed using the genomic DNA kit on Agilent TapeStation 4200 (Agilent technologies, CA). A 10X Genomic library was constructed by using the Chromium Genome Reagent Kits v2 on 10X Chromium Controller (10X Genomics Inc., CA). Chromium i7 Sample Index was used as library barcode. Post library construction quality control was accessed with Qubit 3.0 Fluorometer and Agilent TapeStation 4200. The constructed 10X genomic library was sequenced on a HiSeq X sequencer at the Genomic Services Lab at the HudsonAlpha Institute for Biotechnology.

### Genome assembly and annotation of *wOne* genome using linked reads.

The *N. oneida* genome was assembled using the Supernova 2.1.1 assembler (Weisenfeld, et al. 2017) with all 10X linked reads. The following steps were conducted to identify *wOne* scaffolds in the *N. oneida* assembly (Figure 1): 1) all sequencing reads were aligned to the *N. oneida* assembly to calculate the average and median coverage for each scaffold in the assembly; 2) *N. oneida* scaffolds are aligned to the bacterial sequence database using BLAT version 3.5 (Kent 2002) to determine the percent of sequence identity to known *Wolbachia* sequences; 3) assign the scaffolds to *wOne* genome. A scaffold was assigned to *wOne* genome if it has at least 20% sequence identity with known *Wolbachia* sequences and a median coverage around 60X and GC

content around 0.35. The genome completeness was further evaluated by checkM (Parks, et al. 2015) with default settings and BUSCO (Seppey, et al. 2019) comparing to bacteria database. Gene annotation was conducted using DFAST prokaryotic genome annotation pipeline (Tanizawa, et al. 2018) with few manual correction based on other *Wolbachia* gene models. tRNA genes were predicted by tRNAscan\_SE (Lowe and Eddy 1997).

### **Comparative analysis of *Wolbachia* genomes in the *Nasonia* genus**

To compare the genome structure among three sequenced *Wolbachia* genomes in *Nasonia*, we first conducted whole genome alignment of *wOne*, *wVitA* (GenBank accession GCA\_001983615.1) and *wVitB* (GenBank accession GCA\_000204545.1) (Kent, et al. 2011) genomes using NUCmer in the MUMmer program suite with default parameter settings (Kurtz, et al. 2004). The pairwise alignments (match length longer than 500bp) were visualized using Mummerplot (Kurtz, et al. 2004). Orthologous gene sets between *wOne* and two other *Wolbachia* in *Nasonia* were generated based on reciprocal best hits using BLAST with an E-value cutoff  $10^{-5}$ . 32 genes in *wOne* genome were excluded in this analysis as the gene orthologies are unclear when comparing to *wVitA* and *wVitB*.

### **Phylogenomic analysis of 34 genome sequenced *Wolbachia* strains**

To examine the phylogeny of *Wolbachia* at the genome level, we conducted phylogenomic analysis using *wOne* and 33 other sequenced *Wolbachia* genomes (GenBank accession numbers listed in Table S1), including *wMel* (Wu, et al. 2004), *wBm* (Foster, et al. 2005), *wOo* (Darby, et al. 2012), *wPip* (Klasson, et al. 2008), *wRi* (Klasson, et al. 2009), *wVitB* (Kent, et al. 2011), *wBol1* (Duploux, et al. 2013), *wHa* (Ellegaard, et al. 2013), *wNo* (Ellegaard, et al. 2013), *wGmm* (Brelsfoard, et al. 2014), *wAlbB* (Mavingui, et al. 2012), *wVitA* (Newton, et al. 2016), *wDi*

(Saha, et al. 2012), *wSuzi* (Siozios, et al. 2013), *wTpre* (Lindsey, et al. 2016), *wWb* (Chung, et al. 2017; Desjardins, et al. 2013), *wOv* (Desjardins, et al. 2013), *wPip\_Mol* (Pinto, et al. 2013), *wAu* (Sutton, et al. 2014), *Ob\_Wba* (Derks, et al. 2015), *wCle* (Nikoh, et al. 2014), *wFol* (Faddeeva-Vakhrusheva, et al. 2017), *wCon* (Badawi, et al. 2018), *wDacA* (Ramirez-Puebla, et al. 2016), *wDacB* (Ramirez-Puebla, et al. 2016), *wMelPop* (Woolfit, et al. 2013), *wNfe* (Gerth and Bleidorn 2017), *wNpa* (Gerth and Bleidorn 2017), *wNleu* (Gerth and Bleidorn 2017), *wNfla* (Gerth and Bleidorn 2017), *wSpc* (Conner, et al. 2017) and *wStri*.

Homologous genes and ortholog clusters among all 34 *Wolbachia* genomes were determined by using OrthoFinder (Emms and Kelly 2015) with default settings. 211 core single-copy genes were identified for the subsequent analysis, their accession numbers are listed in Supplemental Table S5. The 211 core single-copy genes shared in all 34 *Wolbachia* genomes were aligned with MAFFT (Kato and Standley 2014) at both nucleotide and protein sequence level. These single-gene alignments were concatenated into one alignment to use in the subsequent phylogenetic analysis. A Maximum Likelihood (ML) tree was constructed with the GTRGAMMA model and 1000 bootstrap replicates by RAxML v8.2 (Stamatakis 2014) using the concatenated coding sequence alignment of the core gene set. Similarly, the single gene trees for 211 core genes were generated by RAxML v8.2 (Stamatakis 2014) to check the consistency of supergroup classification. In addition, for phylogenetic analysis of protein sequences from the core gene set, the best-fit model of protein evolution was searched by ProtTest 3 (Darriba, et al. 2011). The final ML phylogenetic tree was inferred by using RAxML v8.2 (Stamatakis 2014) with the FLU protein model (best fit model identified by ProtTest 3) and 1000 rapid bootstrap replicates. All sequence alignment and tree files have been submitted and made publicly available through Dryad (doi:10.5061/dryad.kg87554).



# **Phylogenetic analysis of *Wolbachia* in *Nasonia* using MLST genes.**

The five MLST (Multi Locus Sequence Typing) genes (Baldo, et al. 2006b; Jolley and Maiden 2010) were examined to further characterize the phylogenetic relationships of *Wolbachia* strains in *Nasonia*. These genes include *gatB* (aspartyl/glutamyl-tRNA (Gln) amidotransferase, subunit B), *coxA* (cytochrome c oxidase, subunit I), *hcpA* (conserved hypothetical protein), *ftsZ* (cell division protein) and *fbpA* (fructose-bisphosphate aldolase). The *wOne* MLST genes were identified on five different genome scaffolds, including *coxA* on SCAFFOLD17, *gatB* on SCAFFOLD28, *hcpA* on SCAFFOLD47, *ftsZ* on SCAFFOLD73 and *fbpA* in SCAFFOLD76. MLST gene sequences of the following strains in different hosts were included in the analysis: *wNvitA*, *wNvitB* in *N. vitripennis*; *wNgirA1*, *wNgirA2*, *wNgirB* in *N. giraulti*; *wNlonA*, *wNlonB1*, *wNlonB2* in *N. longicornis* (Raychoudhury, et al. 2009).

Sequences of MLST genes from *Nasonia Wolbachia* strains were downloaded from the MLST database (Baldo, et al. 2006b). Multiple sequence alignments were generated using MUSCLE (MUltiple Sequence Comparison by Log-Expectation) with default parameters (Edgar 2004). Phylogenetic analysis was performed using the ML method in MEGA 7.0 software (Kumar, et al. 2016). Bootstrap tests with 1,000 replicates were used to evaluate the phylogenetic trees.

In addition, the pairwise evolutionary divergence distances between *Wolbachia* species were estimated with both the core gene set identified in this study and five MLST genes in 34 *Wolbachia* species by using the Maximum Composite Likelihood model (Tamura, et al. 2004) in MEGA7 (Kumar, et al. 2016). Estimates of evolutionary divergence using *ftsZ* gene were only conducted among 31 *Wolbachia* species excluding *wBm*, *wWb* and *wCon*, because of the inability to correctly annotate *ftsZ* in these 3 species. The correlation coefficient ( $\rho$ ) of

estimated evolutionary divergences with the core gene set and MLST genes was calculated with Hmisc package (Harrell Jr and Harrell Jr 2019) in R.

Previous study indicated that sequences of all MLST genes in *wOne* are the same as that in *wNgir* (Raychoudhury, et al. 2009). Therefore, we used sequences of MLST genes in *wNgirA2* and *wNgirB* to check if the *wOneA2* and *wOneB* can be detected in the studied NO. We aligned the sequencing reads to the NG MLST reference sequences from three *Wolbachia* strains in with BWA (Li and Durbin 2009), calculated the coverage, and further examined the alignment of each gene in Integrative Genomics Viewer (IGV) (Thorvaldsdottir, et al. 2013).

# **Strain-typing of *Wolbachia* in *Nasonia* with MLST genes using pyrosequencing.**

*Wolbachia* infection types were further checked in the genome sequenced NO in this study, and genomic DNA samples from a recently (Summer 2018) collected wild-type CAR262L strain using allele-specific pyrosequencing. Pyro PCR and sequencing primers were designed to target SNP positions in *coxA* and *gatB* genes in A1, A2 and B *Wolbachia* using PyroMark Assay Design 2.0 (Qiagen, USA). A complete list of primers sequences could be found in Table S3. The A/G SNP targeted in *coxA* can separate B-*Wolbachia* from A1/A2-*Wolbachia*, and the C/T SNP in *gatB* allowed us to distinguish A1-*Wolbachia* from A2/B-*Wolbachia*. Pyrosequencing was performed on a Pyromark Q48 Autoprep instrument (Qiagen, USA) using the PyroMark Q48 Advanced CpG Reagents (Qiagen, USA). Briefly, the target regions in *coxA* and *gatB* genes were PCR-amplified using the biotin-labeled forward primers and the reverse primers using template genomic DNA samples. Then, pyrosequencing was performed on a PyroMark Q48 Autoprep instrument (Qiagen, USA) using the corresponding sequencing primers by following manufacturer's protocol. The results were analyzed with Pyromark Q48 Autoprep software (Qiagen, USA). Three technical replicates were performed for each sample.

## ***de novo* SNP calling in *wOne* genome**

To identify segregating polymorphisms in the *wOne* genome, all sequencing reads were aligned to *wOneA1* genome using BWA software (Li and Durbin 2009). Initial SNP calling were performed using SAMtools (Li, et al. 2009). SNPs were further checked manually in IGV (Thorvaldsdottir, et al. 2013) to filtered out low-quality and problematic SNPs. A total of 68 high-quality SNPs was kept for the subsequent analysis. The identified SNPs were shown in the circular view of *wOne* genome using BioCircos (Cui, et al. 2016). Coding gene regions were extracted using BEDTools (Quinlan 2014) to annotate genic SNPs. SnpEff (Cingolani, et al. 2012) was used to predict the effects of these genetic variants. Gene Ontology (GO) annotation analysis was done on SNP containing genes using BLAST2GO with an E-value cutoff of  $10^{-5}$  (Conesa, et al. 2005).

## **Acknowledgements**

This project is supported by an Auburn University Intramural Grant Program Award to X.W. (AUIGP 180271) and a generous laboratory start-up fund to X.W. from Auburn University College of Veterinary Medicine. This work is supported by the USDA National Institute of Food and Agriculture, Hatch project 1018100. X.X. and W.C. are supported by Auburn University Presidential Graduate Research Fellowship. Contributions of J.H.W. were supported by US NSF IOS 1456233 and the Nathaniel and Helen Wisch Professorship. We thank HudsonAlpha Genomic Services Lab for Illumina sequencing and Ting Li for help with DNA extractions.

## References

- Badawi M, Moumen B, Giraud I, Greve P, Cordaux R 2018. Investigating the Molecular Genetic Basis of Cytoplasmic Sex Determination Caused by Wolbachia Endosymbionts in Terrestrial Isopods. *Genes (Basel)* 9. doi: 10.3390/genes9060290
- Bailly-Bechet M, et al. 2017. How Long Does Wolbachia Remain on Board? *Mol Biol Evol* 34: 1183-1193. doi: 10.1093/molbev/msx073
- Baldo L, Bordenstein S, Wernegreen JJ, Werren JH 2006a. Widespread recombination throughout Wolbachia genomes. *Mol Biol Evol* 23: 437-449. doi: 10.1093/molbev/msj049
- Baldo L, et al. 2006b. Multilocus sequence typing system for the endosymbiont Wolbachia pipientis. *Appl Environ Microbiol* 72: 7098-7110. doi: 10.1128/AEM.00731-06
- Baldo L, Lo N, Werren JH 2005. Mosaic nature of the wolbachia surface protein. *J Bacteriol* 187: 5406-5418. doi: 10.1128/JB.187.15.5406-5418.2005
- Baldo L, Werren JH 2007. Revisiting Wolbachia supergroup typing based on WSP: spurious lineages and discordance with MLST. *Curr Microbiol* 55: 81-87. doi: 10.1007/s00284-007-0055-8
- Bleidorn C, Gerth M 2018. A critical re-evaluation of multilocus sequence typing (MLST) efforts in Wolbachia. *Fems Microbiology Ecology* 94. doi: ARTN fix163 10.1093/femsec/fix163
- Bordenstein SR, O'Hara FP, Werren JH 2001. Wolbachia-induced incompatibility precedes other hybrid incompatibilities in *Nasonia*. *Nature* 409: 707-710. doi: 10.1038/35055543
- Bordenstein SR, Uy JJ, Werren JH 2003. Host genotype determines cytoplasmic incompatibility type in the haplodiploid genus *Nasonia*. *Genetics* 164: 223-233.
- Bordenstein SR, Wernegreen JJ 2004. Bacteriophage flux in endosymbionts (Wolbachia): infection frequency, lateral transfer, and recombination rates. *Mol Biol Evol* 21: 1981-1991. doi: 10.1093/molbev/msh211
- Breeuwer JA, Werren JH 1993. Cytoplasmic incompatibility and bacterial density in *Nasonia vitripennis*. *Genetics* 135: 565-574.
- Brelsfoard C, et al. 2014. Presence of extensive Wolbachia symbiont insertions discovered in the genome of its host *Glossina morsitans morsitans*. *PLoS Negl Trop Dis* 8: e2728. doi: 10.1371/journal.pntd.0002728
- Chung M, Small ST, Serre D, Zimmerman PA, Dunning Hotopp JC 2017. Draft genome sequence of the Wolbachia endosymbiont of *Wuchereria bancrofti* wWb. *Pathog Dis* 75. doi: 10.1093/femspd/ftx115
- Cingolani P, et al. 2012. A program for annotating and predicting the effects of single nucleotide polymorphisms, SnpEff: SNPs in the genome of *Drosophila melanogaster* strain w1118; iso-2; iso-3. *Fly (Austin)* 6: 80-92. doi: 10.4161/fly.19695
- Conesa A, et al. 2005. Blast2GO: a universal tool for annotation, visualization and analysis in functional genomics research. *Bioinformatics* 21: 3674-3676.

Conner WR, et al. 2017. Genome comparisons indicate recent transfer of wRi-like Wolbachia between sister species *Drosophila suzukii* and *D.subpulchrella*. *Ecology and Evolution* 7: 9391-9404. doi: 10.1002/ece3.3449

Cui Y, et al. 2016. BioCircos.js: an interactive Circos JavaScript library for biological data visualization on web applications. *Bioinformatics* 32: 1740-1742. doi: 10.1093/bioinformatics/btw041

Czarnetzki AB, Tebbe CC 2004. Detection and phylogenetic analysis of Wolbachia in *Collembola*. *Environ Microbiol* 6: 35-44.

Darby AC, et al. 2012. Analysis of gene expression from the Wolbachia genome of a filarial nematode supports both metabolic and defensive roles within the symbiosis. *Genome Res* 22: 2467-2477. doi: 10.1101/gr.138420.112

Darriba D, Taboada GL, Doallo R, Posada D 2011. ProtTest 3: fast selection of best-fit models of protein evolution. *Bioinformatics* 27: 1164-1165. doi: 10.1093/bioinformatics/btr088

Derks MF, et al. 2015. The Genome of Winter Moth (*Operophtera brumata*) Provides a Genomic Perspective on Sexual Dimorphism and Phenology. *Genome Biol Evol* 7: 2321-2332. doi: 10.1093/gbe/evv145

Desjardins CA, et al. 2013. Genomics of *Loa loa*, a Wolbachia-free filarial parasite of humans. *Nat Genet* 45: 495-500. doi: 10.1038/ng.2585

Duploux A, et al. 2013. Draft genome sequence of the male-killing Wolbachia strain wBoll reveals recent horizontal gene transfers from diverse sources. *BMC Genomics* 14: 20. doi: 10.1186/1471-2164-14-20

Edgar RC 2004. MUSCLE: multiple sequence alignment with high accuracy and high throughput. *Nucleic Acids Res* 32: 1792-1797. doi: 10.1093/nar/gkh340

Ellegaard KM, Klasson L, Naslund K, Bourtzis K, Andersson SG 2013. Comparative genomics of Wolbachia and the bacterial species concept. *PLoS Genet* 9: e1003381. doi: 10.1371/journal.pgen.1003381

Emms DM, Kelly S 2015. OrthoFinder: solving fundamental biases in whole genome comparisons dramatically improves orthogroup inference accuracy. *Genome Biol* 16: 157. doi: 10.1186/s13059-015-0721-2

Faddeeva-Vakhrusheva A, et al. 2017. Coping with living in the soil: the genome of the parthenogenetic springtail *Folsomia candida*. *BMC Genomics* 18. doi: ARTN 493 10.1186/s12864-017-3852-x

Fenn K, Blaxter M 2006. Wolbachia genomes: revealing the biology of parasitism and mutualism. *Trends in Parasitology* 22: 60-65. doi: 10.1016/j.pt.2005.12.012

Foster J, et al. 2005. The Wolbachia genome of *Brugia malayi*: endosymbiont evolution within a human pathogenic nematode. *Plos Biology* 3: e121. doi: 10.1371/journal.pbio.0030121

Foster J, Slatko B, Bandi C, Kumar S 2011. Recombination in wolbachia endosymbionts of filarial nematodes? *Applied & Environmental Microbiology* 77: 1921-1922. doi: 10.1128/AEM.02380-10

- Fountain MT, Hopkin SP 2005. *Folsomia candida* (Collembola): a "standard" soil arthropod. *Annu Rev Entomol* 50: 201-222. doi: 10.1146/annurev.ento.50.071803.130331
- Gerth M, Bleidorn C 2017. Comparative genomics provides a timeframe for *Wolbachia* evolution and exposes a recent biotin synthesis operon transfer. *Nature Microbiology* 2. doi: 10.1038/nmicrobiol.2016.241
- Harrell Jr FE, Harrell Jr MFE 2019. Package 'Hmisc'. CRAN2018: 235-236.
- Hilgenboecker K, Hammerstein P, Schlattmann P, Telschow A, Werren JH 2008. How many species are infected with *Wolbachia*?--A statistical analysis of current data. *FEMS Microbiol Lett* 281: 215-220. doi: 10.1111/j.1574-6968.2008.01110.x
- Ilinsky Y, Kosterin OE 2017. Molecular diversity of *Wolbachia* in Lepidoptera: Prevalent allelic content and high recombination of MLST genes. *Mol Phylogenet Evol* 109: 164-179. doi: 10.1016/j.ympev.2016.12.034
- Jiggins FM 2002. The rate of recombination in *Wolbachia* bacteria. *Mol Biol Evol* 19: 1640-1643. doi: 10.1093/oxfordjournals.molbev.a004228
- Jiggins FM, von Der Schulenburg JH, Hurst GD, Majerus ME 2001. Recombination confounds interpretations of *Wolbachia* evolution. *Proc Biol Sci* 268: 1423-1427. doi: 10.1098/rspb.2001.1656
- Jolley KA, Maiden MC 2010. BIGSdb: Scalable analysis of bacterial genome variation at the population level. *BMC Bioinformatics* 11: 595. doi: 10.1186/1471-2105-11-595
- Katoh K, Standley DM 2014. MAFFT: iterative refinement and additional methods. *Methods Mol Biol* 1079: 131-146. doi: 10.1007/978-1-62703-646-7\_8
- Kent BN, et al. 2011. Complete bacteriophage transfer in a bacterial endosymbiont (*Wolbachia*) determined by targeted genome capture. *Genome Biol Evol* 3: 209-218. doi: 10.1093/gbe/evr007
- Kent WJ 2002. BLAT--the BLAST-like alignment tool. *Genome Res* 12: 656-664. doi: 10.1101/gr.229202
- Klasson L, et al. 2008. Genome evolution of *Wolbachia* strain wPip from the *Culex pipiens* group. *Mol Biol Evol* 25: 1877-1887. doi: 10.1093/molbev/msn133
- Klasson L, et al. 2009. The mosaic genome structure of the *Wolbachia* wRi strain infecting *Drosophila simulans*. *Proc Natl Acad Sci U S A* 106: 5725-5730. doi: 10.1073/pnas.0810753106
- Klopfstein S, van Der Schyff G, Tierney S, Austin AD 2018. *Wolbachia* infections in Australian ichneumonid parasitoid wasps (Hymenoptera: Ichneumonidae): evidence for adherence to the global equilibrium hypothesis. *Biological Journal of the Linnean Society* 123: 518-534. doi: 10.1093/biolinnean/blx157
- Kumar S, Stecher G, Tamura K 2016. MEGA7: Molecular Evolutionary Genetics Analysis Version 7.0 for Bigger Datasets. *Mol Biol Evol* 33: 1870-1874. doi: 10.1093/molbev/msw054
- Kurtz S, et al. 2004. Versatile and open software for comparing large genomes. *Genome Biol* 5: R12. doi: 10.1186/gb-2004-5-2-r12
- Li H, Durbin R 2009. Fast and accurate short read alignment with Burrows-Wheeler transform. *Bioinformatics* 25: 1754-1760. doi: 10.1093/bioinformatics/btp324



- Li H, et al. 2009. The Sequence Alignment/Map format and SAMtools. *Bioinformatics* 25: 2078-2079. doi: 10.1093/bioinformatics/btp352
- Lindsey AR, Werren JH, Richards S, Stouthamer R 2016. Comparative Genomics of a Parthenogenesis-Inducing *Wolbachia* Symbiont. *G3 (Bethesda)* 6: 2113-2123. doi: 10.1534/g3.116.028449
- Lindsey ARI, et al. 2018. Evolutionary Genetics of Cytoplasmic Incompatibility Genes *cifA* and *cifB* in Prophage WO of *Wolbachia*. *Genome Biology and Evolution* 10: 434-451. doi: 10.1093/gbe/evy012
- Lowe TM, Eddy SR 1997. tRNAscan-SE: a program for improved detection of transfer RNA genes in genomic sequence. *Nucleic Acids Res* 25: 955-964.
- Ma Y, et al. 2017. Revisiting the phylogeny of *Wolbachia* in Collembola. *Ecol Evol* 7: 2009-2017. doi: 10.1002/ece3.2738
- Mavingui P, et al. 2012. Whole-genome sequence of *Wolbachia* strain wAlbB, an endosymbiont of tiger mosquito vector *Aedes albopictus*. *J Bacteriol* 194: 1840. doi: 10.1128/JB.00036-12
- Newton IL, et al. 2016. Comparative Genomics of Two Closely Related *Wolbachia* with Different Reproductive Effects on Hosts. *Genome Biol Evol* 8: 1526-1542. doi: 10.1093/gbe/evw096
- Nikoh N, et al. 2014. Evolutionary origin of insect-*Wolbachia* nutritional mutualism. *Proc Natl Acad Sci U S A* 111: 10257-10262. doi: 10.1073/pnas.1409284111
- Pan X, Luhrmann A, Satoh A, Laskowski-Arce MA, Roy CR 2008. Ankyrin repeat proteins comprise a diverse family of bacterial type IV effectors. *Science* 320: 1651-1654. doi: 10.1126/science.1158160
- Paraskevopoulos C, Bordenstein SR, Wernegreen JJ, Werren JH, Bourtzis K 2006. Toward a *Wolbachia* multilocus sequence typing system: discrimination of *Wolbachia* strains present in *Drosophila* species. *Curr Microbiol* 53: 388-395. doi: 10.1007/s00284-006-0054-1
- Parks DH, Imelfort M, Skennerton CT, Hugenholtz P, Tyson GW 2015. CheckM: assessing the quality of microbial genomes recovered from isolates, single cells, and metagenomes. *Genome Res* 25: 1043-1055. doi: 10.1101/gr.186072.114
- Perrot-Minnot MJ, Guo LR, Werren JH 1996. Single and double infections with *Wolbachia* in the parasitic wasp *Nasonia vitripennis*: effects on compatibility. *Genetics* 143: 961-972.
- Pinto SB, et al. 2013. Transcriptional Regulation of *Culex pipiens* Mosquitoes by *Wolbachia* Influences Cytoplasmic Incompatibility. *Plos Pathogens* 9. doi: 10.1371/journal.ppat.1003647
- Quinlan AR 2014. BEDTools: The Swiss-Army Tool for Genome Feature Analysis. *Curr Protoc Bioinformatics* 47: 11 12 11-34. doi: 10.1002/0471250953.bi1112s47
- Ramirez-Puebla ST, et al. 2016. Genomes of *Candidatus Wolbachia bourtzisii* wDacA and *Candidatus Wolbachia pipientis* wDacB from the Cochineal Insect *Dactylopius coccus* (Hemiptera: Dactylopiidae). *G3-Genes Genomes Genetics* 6: 3343-3349. doi: 10.1534/g3.116.031237

- Raychoudhury R, Baldo L, Oliveira DCSG, Werren JH 2009. Modes of Acquisition of Wolbachia: Horizontal Transfer, Hybrid Introgression, and Codivergence in the Nasonia Species Complex. *Evolution* 63: 165-183. doi: 10.1111/j.1558-5646.2008.00533.x
- Raychoudhury R, et al. 2010. Behavioral and genetic characteristics of a new species of Nasonia. *Heredity* 104: 278-288. doi: 10.1038/hdy.2009.147
- Reuter M, Keller L 2003. High levels of multiple Wolbachia infection and recombination in the ant *Formica exsecta*. *Mol Biol Evol* 20: 748-753. doi: 10.1093/molbev/msg082
- Ros VI, Fleming VM, Feil EJ, Breeuwer JA 2012. Diversity and recombination in Wolbachia and Cardinium from Bryobia spider mites. *BMC Microbiology* 12 Suppl 1: S13. doi: 10.1186/1471-2180-12-S1-S13
- Saha S, et al. 2012. Survey of endosymbionts in the Diaphorina citri metagenome and assembly of a Wolbachia wDi draft genome. *PLoS One* 7: e50067. doi: 10.1371/journal.pone.0050067
- Sepey M, Manni M, Zdobnov EM 2019. BUSCO: Assessing Genome Assembly and Annotation Completeness. *Methods Mol Biol* 1962: 227-245. doi: 10.1007/978-1-4939-9173-0\_14
- Sinha A, Li Z, Sun L, Carlow CKS 2019. Complete Genome Sequence of the Wolbachia wAlbB Endosymbiont of Aedes albopictus. *Genome Biol Evol* 11: 706-720. doi: 10.1093/gbe/evz025
- Siozios S, et al. 2013. Draft Genome Sequence of the Wolbachia Endosymbiont of Drosophila suzukii. *Genome Announc* 1. doi: 10.1128/genomeA.00032-13
- Stamatakis A 2014. RAxML version 8: a tool for phylogenetic analysis and post-analysis of large phylogenies. *Bioinformatics* 30: 1312-1313. doi: 10.1093/bioinformatics/btu033
- Stouthamer R, Breeuwer JAJ, Hurst GDD 1999. Wolbachia pipientis: Microbial manipulator of arthropod reproduction. *Annual Review of Microbiology* 53: 71-102. doi: DOI 10.1146/annurev.micro.53.1.71
- Sutton ER, Harris SR, Parkhill J, Sinkins SP 2014. Comparative genome analysis of Wolbachia strain wAu. *BMC Genomics* 15: 928. doi: 10.1186/1471-2164-15-928
- Tamura K, Nei M, Kumar S 2004. Prospects for inferring very large phylogenies by using the neighbor-joining method. *Proceedings of the National Academy of Sciences of the United States of America* 101: 11030-11035. doi: 10.1073/pnas.0404206101
- Tanizawa Y, Fujisawa T, Nakamura Y 2018. DFAST: a flexible prokaryotic genome annotation pipeline for faster genome publication. *Bioinformatics* 34: 1037-1039. doi: 10.1093/bioinformatics/btx713
- Thorvaldsdottir H, Robinson JT, Mesirov JP 2013. Integrative Genomics Viewer (IGV): high-performance genomics data visualization and exploration. *Brief Bioinform* 14: 178-192. doi: 10.1093/bib/bbs017
- Vandekerckhove TTM, et al. 1999. Phylogenetic analysis of the 16S rDNA of the cytoplasmic bacterium Wolbachia from the novel host Folsomia candida (Hexapoda, Collembola) and its implications for wolbachial taxonomy. *Fems Microbiology Letters* 180: 279-286. doi: Doi 10.1016/S0378-1097(99)00499-1



- Verne S, Johnson M, Bouchon D, Grandjean F 2007. Evidence for recombination between feminizing Wolbachia in the isopod genus *Armadillidium*. *Gene* 397: 58-66. doi: 10.1016/j.gene.2007.04.006
- Weisenfeld NI, Kumar V, Shah P, Church DM, Jaffe DB 2017. Direct determination of diploid genome sequences. *Genome Res* 27: 757-767. doi: 10.1101/gr.214874.116
- Werren JH 1997. Biology of Wolbachia. *Annu Rev Entomol* 42: 587-609. doi: 10.1146/annurev.ento.42.1.587
- Werren JH, Baldo L, Clark ME 2008. Wolbachia: master manipulators of invertebrate biology. *Nature Reviews Microbiology* 6: 741-751. doi: 10.1038/nrmicro1969
- Werren JH, Bartos JD 2001. Recombination in Wolbachia. *Curr Biol* 11: 431-435.
- Werren JH, Windsor DM 2000. Wolbachia infection frequencies in insects: evidence of a global equilibrium? *Proc Biol Sci* 267: 1277-1285. doi: 10.1098/rspb.2000.1139
- Woolfit M, et al. 2013. Genomic Evolution of the Pathogenic Wolbachia Strain, wMelPop. *Genome Biology and Evolution* 5: 2189-2204. doi: 10.1093/gbe/evt169
- Wu M, et al. 2004. Phylogenomics of the reproductive parasite Wolbachia pipientis wMel: A streamlined genome overrun by mobile genetic elements. *Plos Biology* 2: 327-341. doi: 10.1371/journal.pbio.0020069
- Zug R, Hammerstein P 2012. Still a host of hosts for Wolbachia: analysis of recent data suggests that 40% of terrestrial arthropod species are infected. *PLoS One* 7: e38544. doi: 10.1371/journal.pone.0038544

## Tables

**Table 1. *w*One assembly summary statistics and comparison with *w*VitA and *w*VitB genomes.**

|                                   | <b>wOne</b> | <b>wVitA</b> | <b>wVitB</b> |
|-----------------------------------|-------------|--------------|--------------|
| <b>Number of contigs</b>          | 65          | 142          | 509          |
| <b>Number of scaffolds</b>        | 47          | N/A          | 426          |
| <b>Contig N50 (kb)</b>            | 35.88       | 13.38        | 5.79         |
| <b>Scaffold N50 (kb)</b>          | 128.97      | N/A          | 6.21         |
| <b>Number of proteins</b>         | 1,114       | 1,042        | 845          |
| <b>Assembled genome size (bp)</b> | 1,293,406   | 1,211,929    | 1,107,643    |
| <b>BUSCO Completeness (%)</b>     | 86.5        | 87.2         | 85.1         |
| <b>checkM Completeness (%)</b>    | 97.01       | 99.79        | 99.57        |
| <b>checkM Contamination (%)</b>   | 0           | 0.64         | 1.71         |

**Table 2. Number of IS in *w*One, *w*VitA and *w*VitB.**

| <b>Family</b> | <b>Number in <i>w</i>One</b> | <b>Number in <i>w</i>VitA</b> | <b>Number in <i>w</i>VitB</b> |
|---------------|------------------------------|-------------------------------|-------------------------------|
| IS3           | 0                            | 0                             | 0                             |
| IS4           | 0                            | 1                             | 0                             |
| IS5           | 1                            | 1                             | 1                             |
| IS5/IS1182    | 0                            | 1                             | 0                             |
| IS6           | 0                            | 0                             | 2                             |
| IS66          | 0                            | 2                             | 0                             |
| IS110         | 2                            | 2                             | 0                             |
| IS200/IS605   | 2                            | 0                             | 1                             |
| IS256         | 0                            | 1                             | 2                             |
| IS481         | 0                            | 0                             | 2                             |
| IS630         | 0                            | 0                             | 2                             |
| IS982         | 0                            | 1                             | 0                             |

**Table 3. Estimates of evolutionary divergence between *Wolbachia* species using core gene set and five MLST genes.**

| <b>Correlation coefficient (rho)</b> | <b>core gene set</b> | <b>gatB</b> | <b>fbpA</b> | <b>hcpA</b> | <b>coxA</b> | <b>ftsZ*</b> |
|--------------------------------------|----------------------|-------------|-------------|-------------|-------------|--------------|
| <b>core gene set</b>                 | 1                    | 0.96        | 0.90        | 0.97        | 0.92        | 0.97         |
| <b>gatB</b>                          |                      | 1           | 0.86        | 0.91        | 0.90        | 0.94         |
| <b>fbpA</b>                          |                      |             | 1           | 0.87        | 0.84        | 0.92         |
| <b>hcpA</b>                          |                      |             |             | 1           | 0.89        | 0.96         |
| <b>coxA</b>                          |                      |             |             |             | 1           | 0.92         |
| <b>ftsZ*</b>                         |                      |             |             |             |             | 1            |

\*Estimates of evolutionary divergence using ftsZ gene were only conducted among 31 *Wolbachia* species excluding wBm, wWb and wCon, because of the inability to correctly annotate ftsZ in these 3 species.

## Figures

Figure 1. The workflow of *w*One genome assembly using 10X Genomics linked reads.

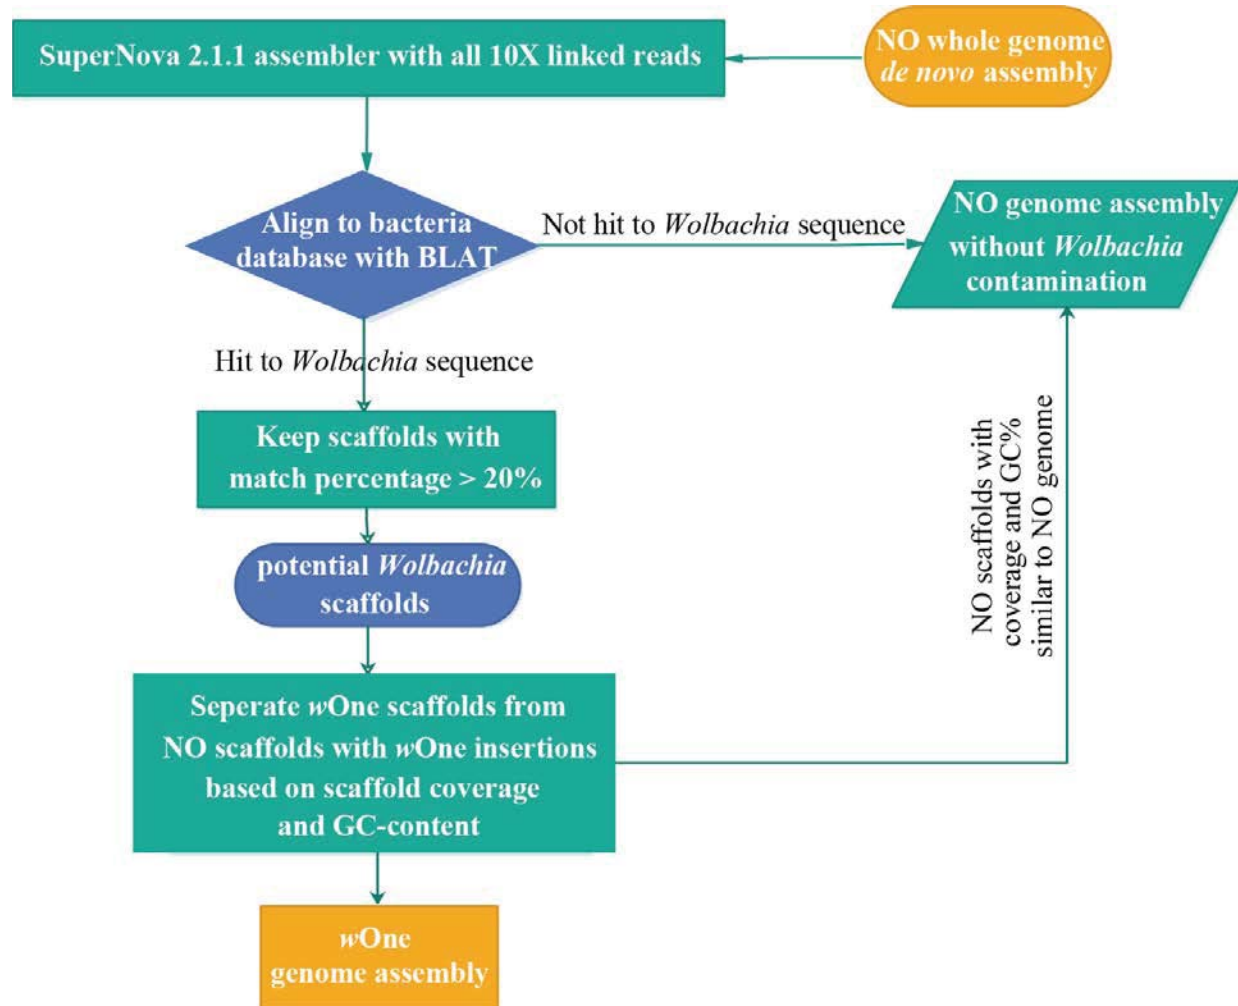

**Figure 2. Comparison of median coverage and GC content between *Nasonia oneida* (NO) genome and *wOne* genome.**

(A) scatter plot of median coverage and GC% indicating clear separation of NO and *wOne* genomes, blue square represents *wOne* genome and red dot represents NO genome, the NO mtDNA was labeled as green triangle; (B) box plot of median coverage between NO and *wOne* genomes, green line indicates the coverage of NO mtDNA; (C) box plot of GC% between NO and *wOne* genomes, green line indicates the GC% of NO mtDNA.

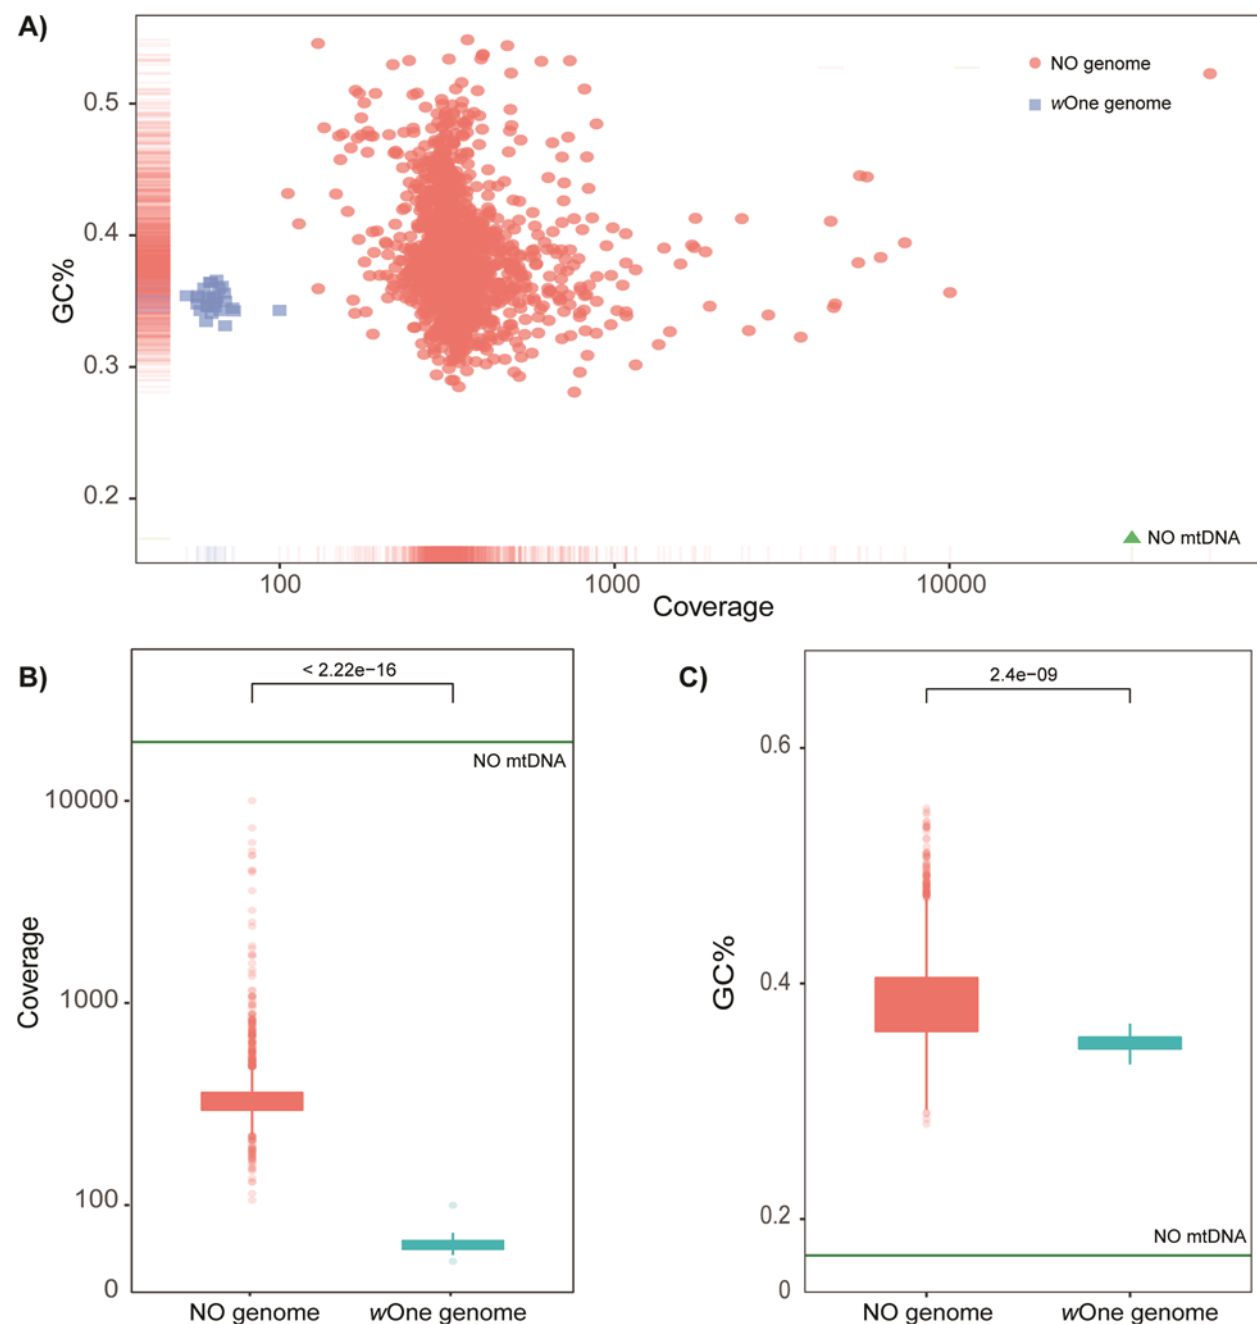

### Figure 3. Comparative genomic analysis of *wOne*, *wVitA* and *wVitB* genomes.

(A) Dot plot showing comparison between *wOne* and *wVitA* genomes, red for a forward match and blue for a reverse match; (B) Dot plot showing comparison between *wOne* and *wVitB* genomes; (C) Dot plot showing comparison between *wVitA* and *wVitB* genomes; (D) Venn Diagram showing comparison of genes and pseudogenes in *wOne*, *wVitA* and *wVitB*.

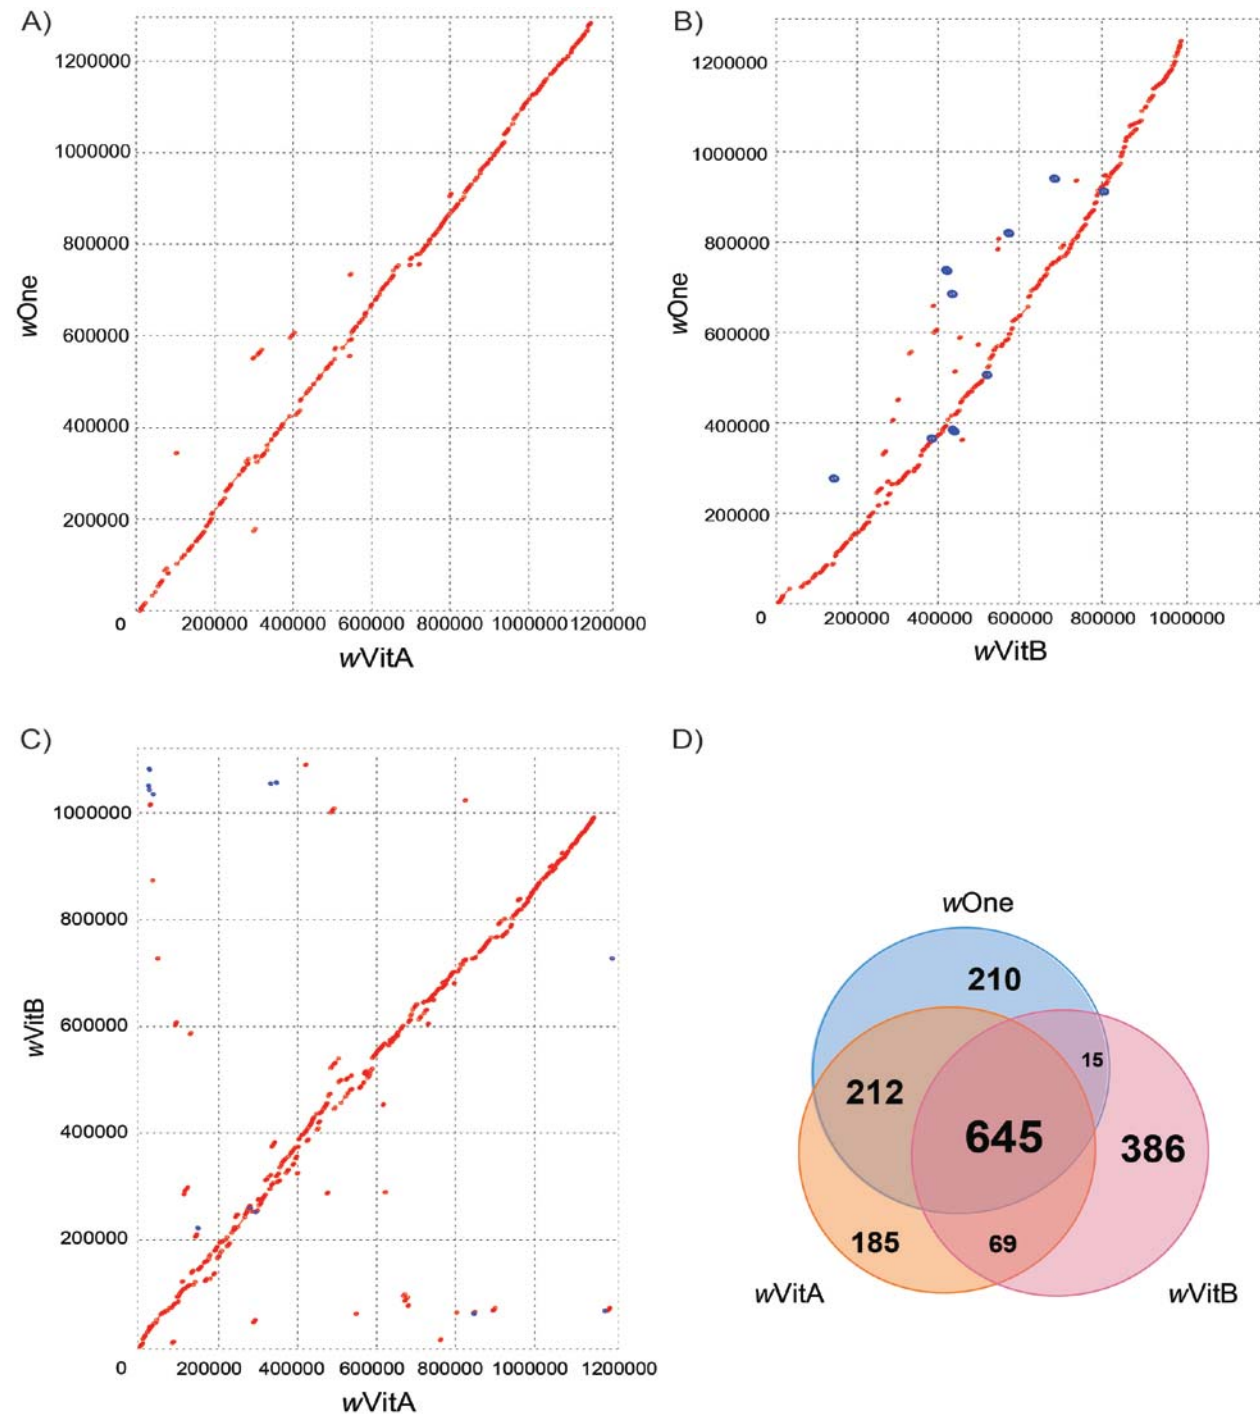

# Figure 4. Phylogenomic relationships of 34 *Wolbachia* strains.

The phylogenetic tree was constructed using Maximum Likelihood method from a concatenated coding sequence alignment of 211 single-copy orthologous genes with RAxML. Numbers on the branches represent the support from 1000 bootstrap replicates. The supergroup classifications (A-F) represent following the color code. The host taxonomic classifications for most of *Wolbachia* strains are shown in different color code.

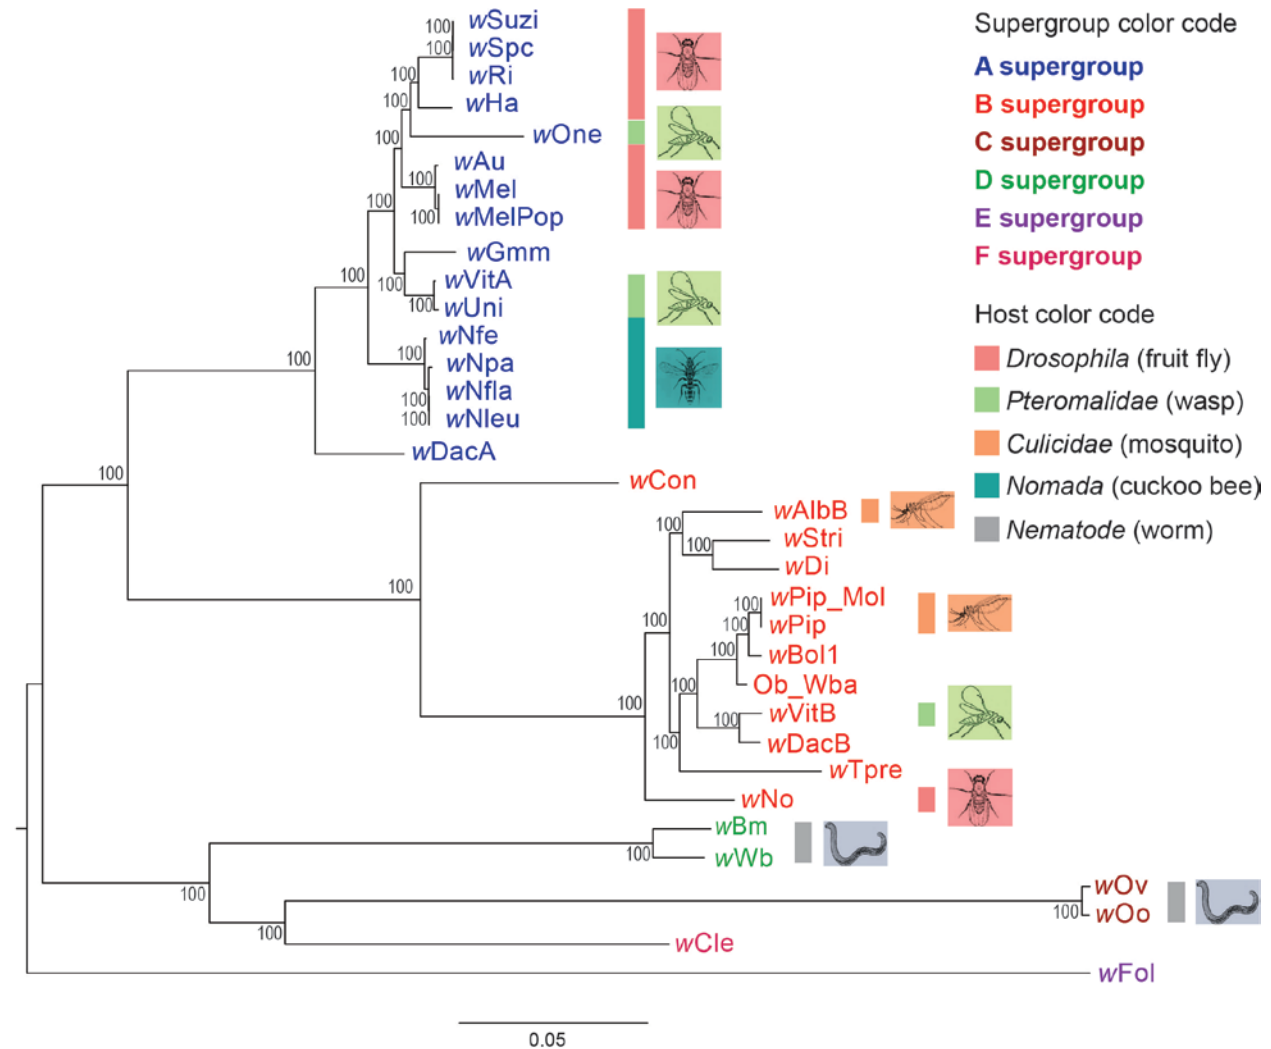

**Figure 5. RAxML tree revealed lateral gene transfer between *wOne* and *B-Wolbachia*.**

The supergroup classifications follow the color code in Figure 4. Nucleotides at selected positions are shown in the right panels (green:A; blue: C; yellow: G; pink: T). Hypothetical protein WONE\_01840 from *wOne* (A supergroup) clusters with *B-Wolbachia*.

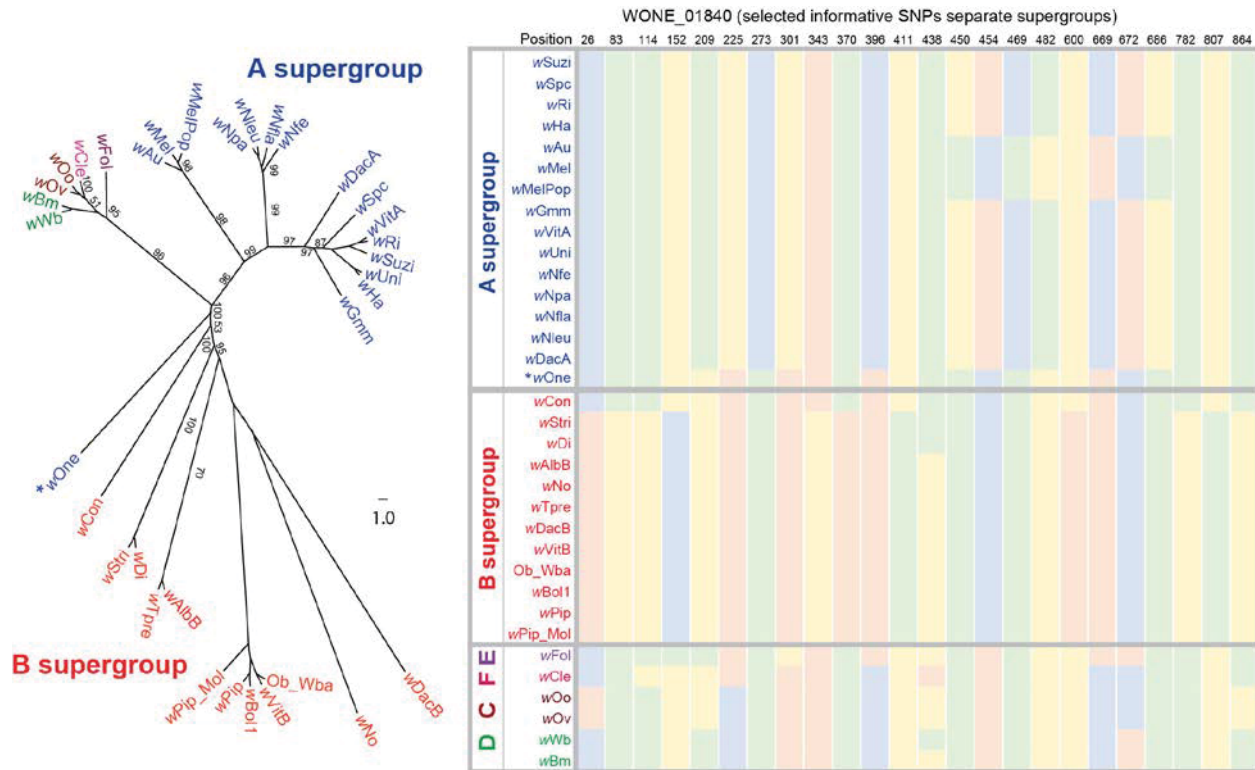



# Figure 6. RAxML trees revealed lateral gene transfer between A-Wolbachia and B/E-Wolbachia in coxB and WONE\_04820 genes.

The supergroup classifications follow the color code in earlier figures. Nucleotides at selected positions are shown in the right panels. (A) In ML tree of coxB, wAlbB (B supergroup) and wFol (E supergroup) cluster with A-Wolbachia, respectively; (B) In ML tree of hypothetical protein WONE\_04820, wCon, wDi and wTpre and wAlbB (B supergroup) cluster with A-Wolbachia, and wFol (E supergroup) clusters with A-Wolbachia.

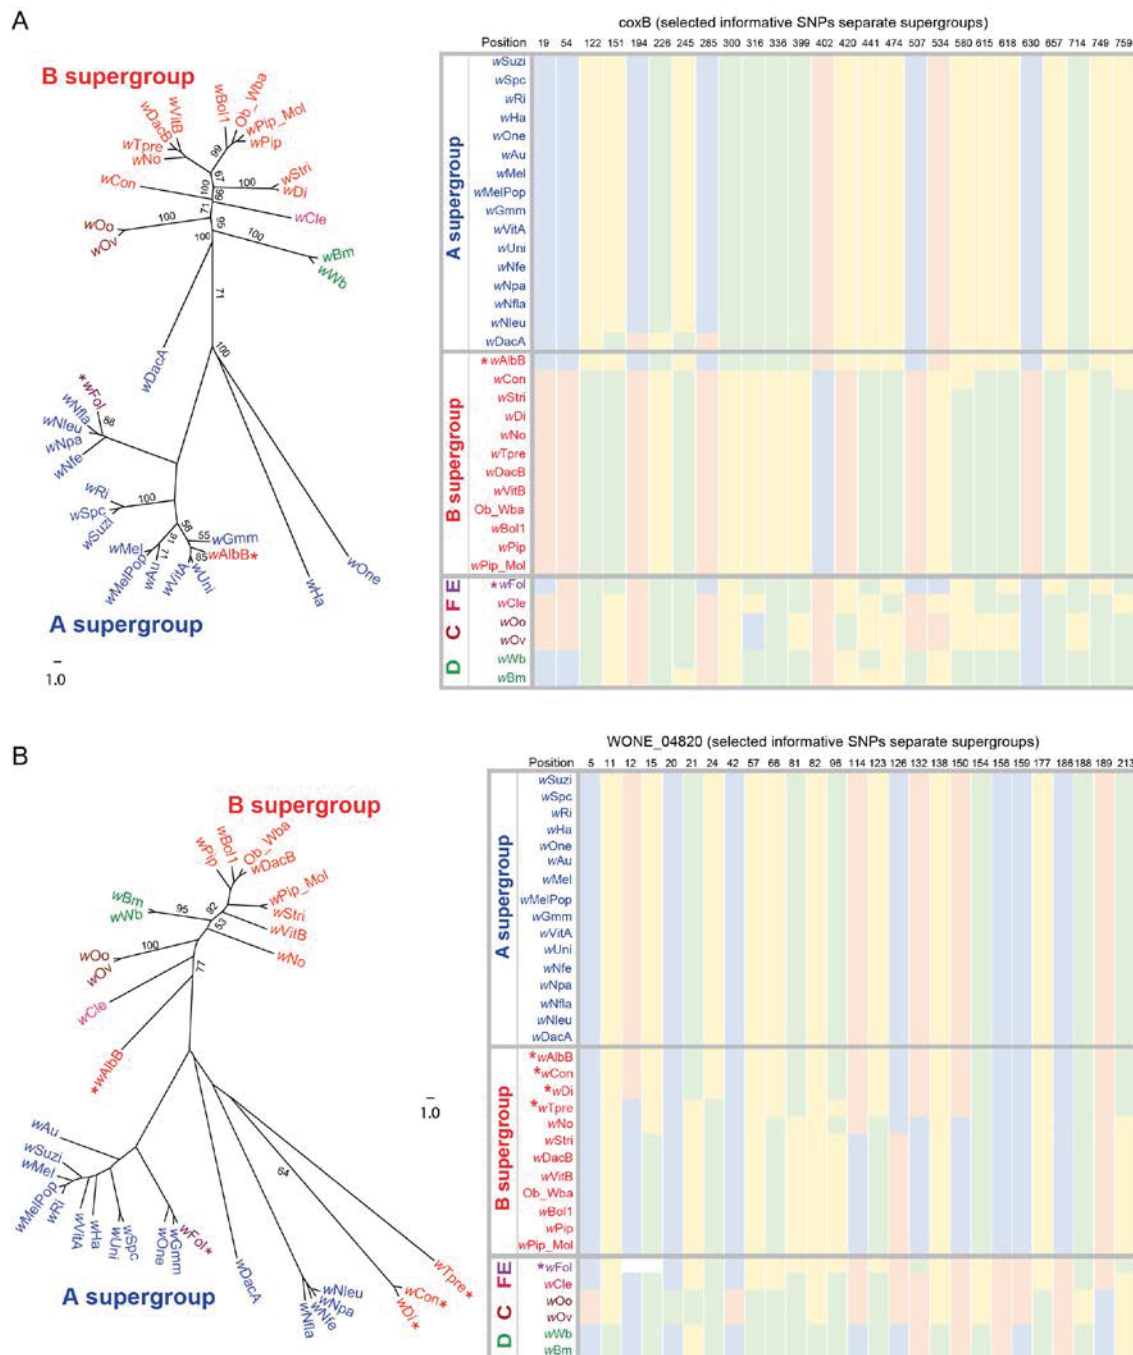



## Figure 8. Distinct tree structure difference revealed in *argS* gene.

The supergroup classifications follow the color code in earlier figures. (A) Tree structure of *argS* (from starting site to 570 bp) revealed that *wDi* (B supergroup) clusters with A-*Wolbachia*; (B) Tree structure of *argS* (from 1141 bp to stop site) revealed that *wDacA* (A supergroup) clusters with E-*Wolbachia* and *wCon* clusters with D-*Wolbachia*, indicating intragenic recombination events; (C) Nucleotides at selected positions (1-570 bp in *argS*) supported the tree topology in (A); (D) Nucleotides at selected positions (1141-1708 bp in *argS*) supported the tree topology in (B).

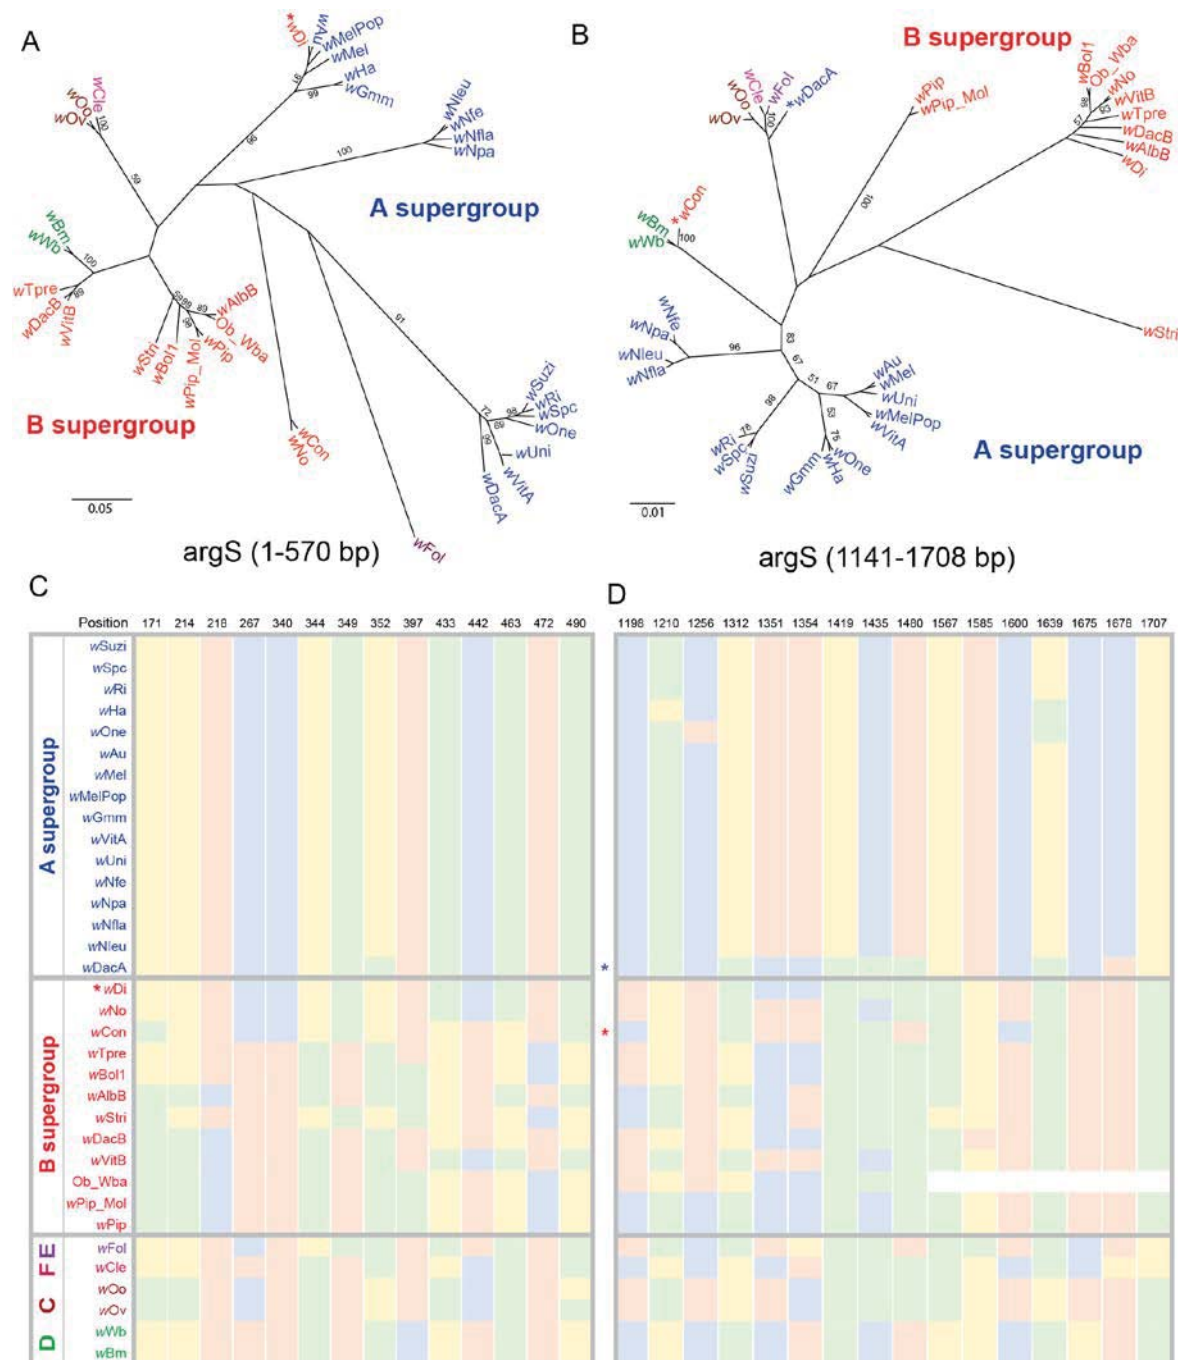

**Figure 9. Phylogenetic tree of *Wolbachia* in *Nasonia* with Maximum Likelihood method based on five MLST genes.**

The bootstrap consensus tree inferred from 1000 replicates. A and B supergroups were clustered into two groups in trees of all five MLST genes.

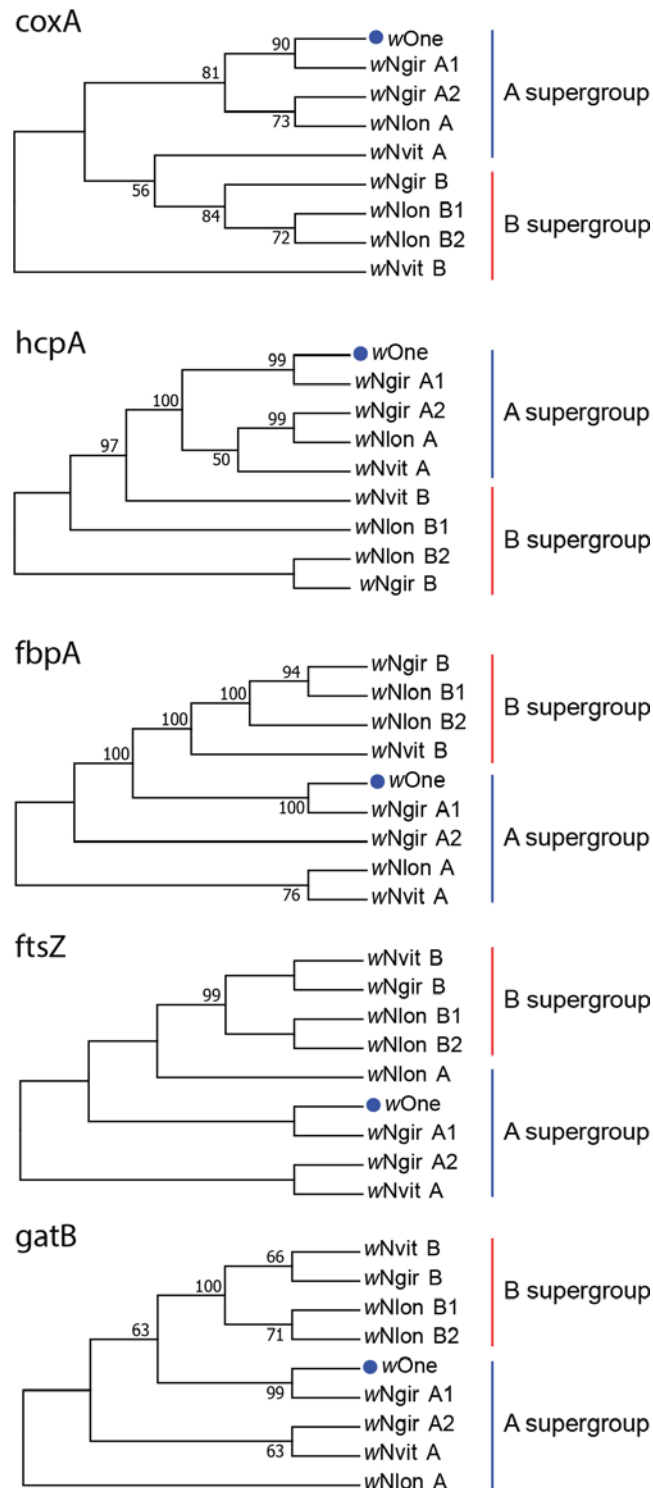



**Figure 10. Polymorphic SNPs in *wOne* genome.** (A) Circular view of *wOne* genome with the blue and orange spots indicate the identified SNP positions. Read alignments for SNPs located in WONE\_08300 gene region in Scaffold10 was shown in IGV screenshots, suggesting these polymorphisms result from gene duplications in *wOne* genome. (B) Nucleotide sequence alignment between new assembly from reads with SNPs and WONE\_08300 gene. (C) Protein sequence alignment between new assembly from reads with SNPs and WONE\_08300 gene.

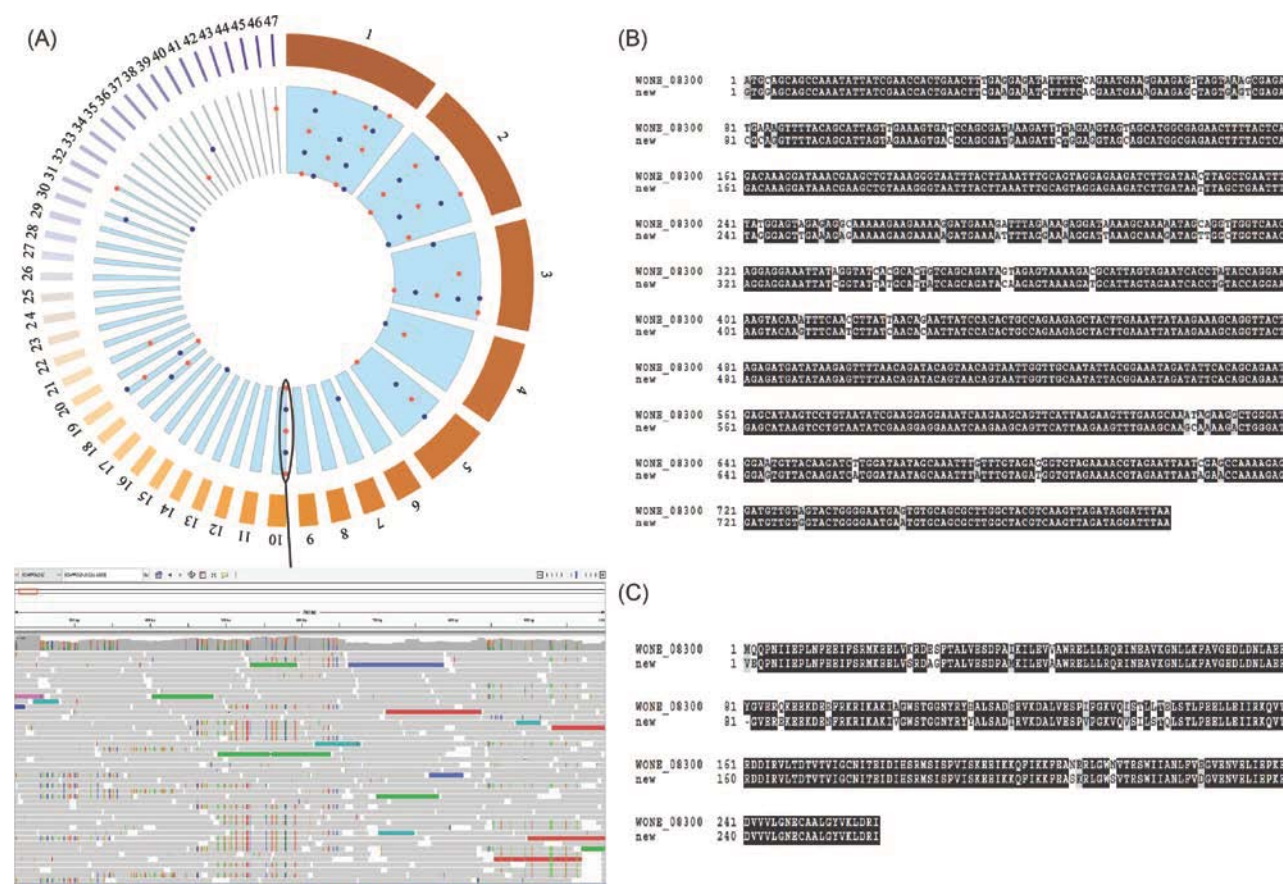

## Supplemental Tables

**Table S1. Summary of current sequenced *Wolbachia* whole genomes.**

| Strain | Super group | Host species                   | Genome size (Mb) | Genome GenBank Accession | Method of bacterial DNA purification                                                                   | Assembly method                                   | Reference                |
|--------|-------------|--------------------------------|------------------|--------------------------|--------------------------------------------------------------------------------------------------------|---------------------------------------------------|--------------------------|
| wMel   | A           | <i>Drosophila melanogaster</i> | 1.268            | GCA_000008025.1          | Purified from adult flies on pulsed-field gels                                                         | TIGR Assembler                                    | (Wu, et al. 2004)        |
| wBm    | D           | <i>Brugia malayi</i>           | 1.080            | GCA_000008385.1          | Selected wBm BACs from host BAC library                                                                | PHRED-PHRAP-CONSED                                | (Foster, et al. 2005)    |
| wPip   | B           | <i>Culex pipiens</i>           | 1.482            | GCA_000073005.1          | Filter purification from preblastoderm embryos                                                         | PHRAP                                             | (Klasson, et al. 2008)   |
| wRi    | A           | <i>Drosophila simulans</i>     | 1.446            | GCA_000022285.1          | Concentrated wRi cells using renografin gradient and plug agarose to purify DNA                        | PHRED-PHRAP-CONSED                                | (Klasson, et al. 2009)   |
| wVitB  | B           | <i>Nasonia vitripennis</i>     | 1.108            | GCA_000204545.1          | Enrichment of wVitB DNA with a high-density tiled oligonucleotide array                                | Velvet assembler                                  | (Kent, et al. 2011)      |
| wAlbB  | B           | <i>Aedes albopictus</i>        | 1.240            | GCA_000242415.3          | Extracted from infected mosquito cell line and Multiple-displacement amplification (MDA) to purify DNA | Newbler                                           | (Mavingui, et al. 2012)  |
| wDi    | B           | <i>Diaphorina citri</i>        | 1.241            | GCA_000331595.1          | N/A                                                                                                    | wDi reads filtered from its host genome sequences | (Saha, et al. 2012)      |
| wOo    | C           | <i>Onchocerca ochengi</i>      | 0.960            | GCA_000306885.1          | N/A                                                                                                    | Generated wOo genome from host assembly           | (Darby, et al. 2012)     |
| wHa    | A           | <i>Drosophila simulans</i>     | 1.296            | GCA_000376605.1          | Filter purification of wHa cells from host preblastoderm embryos and performed MDA to purify DNA       | Newbler and MIRA                                  | (Ellegaard, et al. 2013) |
| wNo    | B           | <i>Drosophila simulans</i>     | 1.302            | GCA_000376585.1          | Same method as used for wHa                                                                            | Newbler and MIRA                                  | (Ellegaard, et al. 2013) |

|          |   |                                     |       |                 |                                                                                               |                                                                                        |                           |
|----------|---|-------------------------------------|-------|-----------------|-----------------------------------------------------------------------------------------------|----------------------------------------------------------------------------------------|---------------------------|
| wSuzi    | A | <i>Drosophila suzukii</i>           | 1.415 | GCA_00033795.2  | N/A                                                                                           | wSuzi reads filtered from its host genome sequences and assembled with Velvet and MIRA | (Siozios, et al. 2013)    |
| wBol1    | B | <i>Hypolimnas bolina</i>            | 1.378 | GCA_00033775.1  | Filter purification from wBol1-b-infected cells and extra separation step on percoll gradient | AGRF                                                                                   | (Duploury, et al. 2013)   |
| wOv      | C | <i>Onchocerca volvulus</i>          | 0.961 | GCA_000530755.1 | N/A                                                                                           | wOv reads filtered from host genome sequences and assembled with Newbler               | (Desjardins, et al. 2013) |
| wPip_Mol | B | <i>Culex molestus</i>               | 1.436 | GCA_000723225.2 | Unknown                                                                                       | Newbler                                                                                | (Pinto, et al. 2013)      |
| wGmm     | A | <i>Glossina morsitans morsitans</i> | 1.020 | GCA_000689175.1 | wGmm DNA extracted from ovaries of host adult female                                          | MIRA                                                                                   | (Brelsfoard, et al. 2014) |
| wCle     | F | <i>Cimex lectularius</i>            | 1.250 | GCA_000829315.1 | Extracted DNA from bacteriomes of bedbugs                                                     | PHRED-PHRAP-CONSED                                                                     | (Nikoh, et al. 2014)      |
| wAu      | A | <i>Drosophila simulans</i>          | 1.268 | GCA_000953315.1 | Filtration from host adults / cell lines and DNase treatment                                  | Hierarchical Genome Assembly Process (HGAP)                                            | (Sutton, et al. 2014)     |
| Ob_Wba   | B | <i>Operophtera brumata</i>          | 1.121 | GCA_001266585.1 | N/A                                                                                           | Extracted Ob_Wba reads from host sequence reads and assembled with Celera              | (Derks, et al. 2015)      |
| wVitA    | A | <i>Nasonia vitripennis</i>          | 1.212 | GCA_001983615.1 | wVitA DNA purified with filter column from host pupa                                          | Velvet and Newbler                                                                     | (Newton, et al. 2016)     |
| wUni     | A | <i>Muscidifurax uniraptor</i>       | 1.049 |                 | Same method as used for wVitA                                                                 | Velvet and Newbler                                                                     | (Newton, et al. 2016)     |
| wTpre    | B | <i>Trichogramma pretiosum</i>       | 1.134 | GCA_001439985.1 | N/A                                                                                           | wTpre sequences queried against <i>T. pretiosum</i> genome assembly                    | (Lindsey, et al. 2016)    |
| wWb      | D | <i>Wuchereria bancrofti</i>         | 1.061 | GCA_002204235.2 | N/A                                                                                           | Extracted wWb sequences from WGS of W. bancrofti, assembled with SPAdes                | (Chung, et al. 2017)      |



|         |   |                                 |       |                     |                                                      |                                                  |                                     |
|---------|---|---------------------------------|-------|---------------------|------------------------------------------------------|--------------------------------------------------|-------------------------------------|
| wFol    | E | <i>Folsomia candida</i>         | 1.802 | GCA_0019<br>31755.2 | N/A                                                  | Assembled from the host scaffolds                | (Faddeeva-Vakhrusheva, et al. 2017) |
| wCon    | B | <i>Cylisticus convexus</i>      | 2.110 | GCA_0033<br>44345.1 | wCon DNA extracted from ovaries of host adult female | Newbler                                          | (Badawi, et al. 2018)               |
| wSpc    | A | <i>Drosophila subpulchrella</i> | 1.420 | GCA_0023<br>00525.1 | Unknown                                              | ABYSS                                            | (Conner, et al. 2017)               |
| wStri   | B | <i>Laodelphax striatella</i>    | 1.232 | GCA_0016<br>37495.1 | Unknown                                              | CLC genomics workbench                           | Unpublished                         |
| wDacA   | A | <i>Dactylopius coccus</i>       | 1.171 | GCA_0016<br>48025.1 | Unknown                                              | MetaVelvet, Newbler, SPAdes, HGAP, and SeqManPro | (Ramirez-Puebla, et al. 2016)       |
| wDacB   | B | <i>Dactylopius coccus</i>       | 1.498 | GCA_0016<br>48015.1 | Unknown                                              | Same as used for wDacA                           | (Ramirez-Puebla, et al. 2016)       |
| wMelPop | A | <i>Drosophila melanogaster</i>  | 1.239 | GCA_0004<br>75015.1 | Unknown                                              | Newbler                                          | (Woelffit, et al. 2013)             |
| wNpa    | A | <i>Nomada panzeri</i>           | 1.344 | GCA_0016<br>75775.1 | Unknown                                              | SPAdes                                           | (Gerth and Bleidorn 2017)           |
| wNfe    | A | <i>Nomada ferruginata</i>       | 1.338 | GCA_0016<br>75785.1 | Unknown                                              | SPAdes                                           | (Gerth and Bleidorn 2017)           |
| wNleu   | A | <i>Nomada leucophthalma</i>     | 1.367 | GCA_0016<br>75715.1 | Unknown                                              | SPAdes                                           | (Gerth and Bleidorn 2017)           |
| wNfla   | A | <i>Nomada flava</i>             | 1.333 | GCA_0016<br>75695.1 | Unknown                                              | SPAdes                                           | (Gerth and Bleidorn 2017)           |

**Table S2. Strain type of wOne using informative SNPs in MLST genes.**

| MLST gene | SNP position | A1 allele | A1 allele count | A2 allele | A2 allele count |
|-----------|--------------|-----------|-----------------|-----------|-----------------|
| gatB      | 23           | G         | 46              | A         | 0               |
|           | 27           | A         | 49              | G         | 0               |
|           | 126          | T         | 52              | C         | 0               |
|           | 147          | G         | 55              | A         | 0               |
|           | 231          | A         | 36              | G         | 0               |
|           | 264          | T         | 40              | C         | 0               |
|           | 272          | T         | 39              | C         | 0               |
|           | 292          | A         | 45              | C         | 0               |
|           | 296          | G         | 45              | A         | 0               |
|           | 315          | C         | 43              | T         | 0               |
|           | 366          | G         | 39              | T         | 0               |
| coxA      | 15           | C         | 41              | A         | 0               |
|           | 58           | T         | 54              | C         | 0               |
|           | 104          | T         | 53              | C         | 0               |
| hcpA      | 126          | A         | 48              | G         | 0               |
|           | 132          | A         | 43              | C         | 0               |
|           | 148          | A         | 42              | G         | 0               |
|           | 150          | T         | 44              | G         | 0               |
|           | 179          | C         | 51              | T         | 0               |
|           | 180          | C         | 52              | T         | 0               |
|           | 192          | C         | 51              | T         | 0               |
|           | 201          | T         | 54              | A         | 0               |
|           | 225          | C         | 55              | A         | 0               |
|           | 234          | T         | 57              | C         | 0               |
|           | 237          | A         | 57              | G         | 0               |
|           | 246          | T         | 57              | C         | 0               |
|           | 249          | A         | 61              | G         | 0               |
| fbpA      | 45           | C         | 68              | T         | 0               |
|           | 54           | G         | 65              | A         | 0               |
|           | 58           | A         | 71              | G         | 0               |
|           | 63           | G         | 68              | A         | 0               |
|           | 66           | T         | 69              | C         | 0               |
|           | 75           | A         | 72              | G         | 0               |
|           | 102          | A         | 57              | G         | 0               |
|           | 114          | C         | 57              | A         | 0               |
|           | 120          | G         | 56              | A         | 0               |
|           | 126          | T         | 56              | C         | 0               |
|           | 174          | A         | 54              | G         | 0               |
|           | 185          | A         | 53              | G         | 0               |
|           | 190          | G         | 56              | A         | 0               |
|           | 213          | G         | 52              | A         | 0               |
|           | 226          | T         | 52              | C         | 0               |
|           | 252          | A         | 62              | G         | 0               |
|           | 276          | G         | 68              | A         | 0               |
|           | 300          | A         | 75              | G         | 0               |
|           | 354          | A         | 88              | G         | 0               |
|           | 400          | C         | 77              | T         | 0               |
|           | 426          | A         | 53              | G         | 0               |

**Table S3. PCR and sequencing primers of *coxA* and *gatB* genes used in pyrosequencing for strain-typing of *Wolbachia* in *nasonia*.**

| Gene              | <i>coxA</i>                     | <i>gatB</i>                  |
|-------------------|---------------------------------|------------------------------|
| A1 allele         | A                               | T                            |
| A2 allele         | A                               | C                            |
| B allele          | G                               | C                            |
| Forward primer    | [Biotin]TTATGTTGATTGTTGCCTTACCA | [Biotin]AGGCAGATTTTGCGTTACAT |
| Reverse primer    | CAGGATCAAAAAAGGAAGTACCA         | TCACAACGAGTGCCAAATG          |
| Sequencing primer | TCAAAAAAGGAAGTACCA              | AACGAGTGCCAAATG              |

**Table S4. List of 27 genic segregating SNPs in wOne genome.**

| SNP ID    | Scaffold   | Position | Alleles | Coverage | Reference allele count | Alternative allele count | Gene ID                         | SNP effect               |
|-----------|------------|----------|---------|----------|------------------------|--------------------------|---------------------------------|--------------------------|
| wOneSNP03 | SCAFFOLD1  | 54805    | T/G     | 84       | 57                     | 27                       | hypothetical protein WONE_00490 | nonsynonymous / moderate |
| wOneSNP07 | SCAFFOLD1  | 120377   | A/C     | 88       | 64                     | 24                       | SecY                            | nonsynonymous / moderate |
| wOneSNP15 | SCAFFOLD1  | 208872   | A/G     | 88       | 60                     | 28                       | hypothetical protein WONE_01750 | nonsynonymous / moderate |
| wOneSNP16 | SCAFFOLD1  | 208889   | G/T     | 89       | 55                     | 34                       | hypothetical protein WONE_01750 | nonsynonymous / moderate |
| wOneSNP27 | SCAFFOLD2  | 197059   | A/G     | 92       | 49                     | 43                       | hypothetical protein WONE_03520 | synonymous               |
| wOneSNP30 | SCAFFOLD3  | 128108   | T/C     | 80       | 48                     | 32                       | hypothetical protein WONE_04670 | synonymous               |
| wOneSNP31 | SCAFFOLD3  | 128171   | C/A     | 72       | 34                     | 38                       | hypothetical protein WONE_04670 | nonsynonymous / moderate |
| wOneSNP32 | SCAFFOLD3  | 128177   | C/T     | 67       | 32                     | 35                       | hypothetical protein WONE_04670 | synonymous               |
| wOneSNP33 | SCAFFOLD3  | 130774   | A/G     | 96       | 75                     | 21                       | hypothetical protein WONE_04690 | synonymous               |
| wOneSNP34 | SCAFFOLD3  | 156067   | G/C     | 81       | 60                     | 21                       | cysS                            | nonsynonymous / moderate |
| wOneSNP39 | SCAFFOLD5  | 41230    | C/T     | 92       | 69                     | 23                       | MFS transporter                 | nonsynonymous / moderate |
| wOneSNP44 | SCAFFOLD10 | 322      | T/A     | 80       | 54                     | 26                       | baseplate assembly protein      | synonymous               |
| wOneSNP45 | SCAFFOLD10 | 331      | T/C     | 82       | 54                     | 28                       | baseplate assembly protein      | synonymous               |
| wOneSNP46 | SCAFFOLD10 | 448      | C/T     | 89       | 62                     | 27                       | baseplate assembly protein      | synonymous               |
| wOneSNP47 | SCAFFOLD10 | 611      | A/G     | 91       | 52                     | 39                       | baseplate assembly protein      | nonsynonymous / moderate |
| wOneSNP48 | SCAFFOLD10 | 636      | C/T     | 94       | 61                     | 33                       | baseplate assembly protein      | nonsynonymous / moderate |
| wOneSNP49 | SCAFFOLD10 | 642      | T/C     | 94       | 62                     | 32                       | baseplate assembly protein      | nonsynonymous / moderate |
| wOneSNP50 | SCAFFOLD10 | 647      | G/C     | 90       | 62                     | 28                       | baseplate assembly protein      | nonsynonymous / moderate |
| wOneSNP51 | SCAFFOLD10 | 877      | T/A     | 81       | 45                     | 36                       | baseplate assembly protein      | synonymous               |
| wOneSNP52 | SCAFFOLD10 | 928      | C/A     | 75       | 36                     | 39                       | baseplate assembly protein      | synonymous               |
| wOneSNP53 | SCAFFOLD10 | 931      | G/A     | 75       | 36                     | 39                       | baseplate assembly protein      | synonymous               |
| wOneSNP54 | SCAFFOLD10 | 964      | G/A     | 69       | 45                     | 24                       | baseplate assembly protein      | synonymous               |
| wOneSNP56 | SCAFFOLD18 | 11384    | T/C     | 88       | 47                     | 41                       | hypothetical protein WONE_09680 | synonymous               |
| wOneSNP57 | SCAFFOLD18 | 11387    | C/A     | 93       | 45                     | 48                       | hypothetical protein WONE_09680 | synonymous               |
| wOneSNP63 | SCAFFOLD30 | 5939     | C/T     | 84       | 61                     | 23                       | hypothetical protein WONE_10710 | synonymous               |
| wOneSNP65 | SCAFFOLD32 | 434      | A/G     | 94       | 51                     | 43                       | hypothetical protein WONE_10780 | synonymous               |
| wOneSNP66 | SCAFFOLD38 | 2021     | T/C     | 66       | 42                     | 24                       | transposase                     | nonsynonymous / moderate |

## Supplemental Figures

**Figure S1. Phylogenetic analysis of 34 *Wolbachia* genomes using Maximum Likelihood method from a concatenated protein alignment of 211 single-copy orthologous genes.**

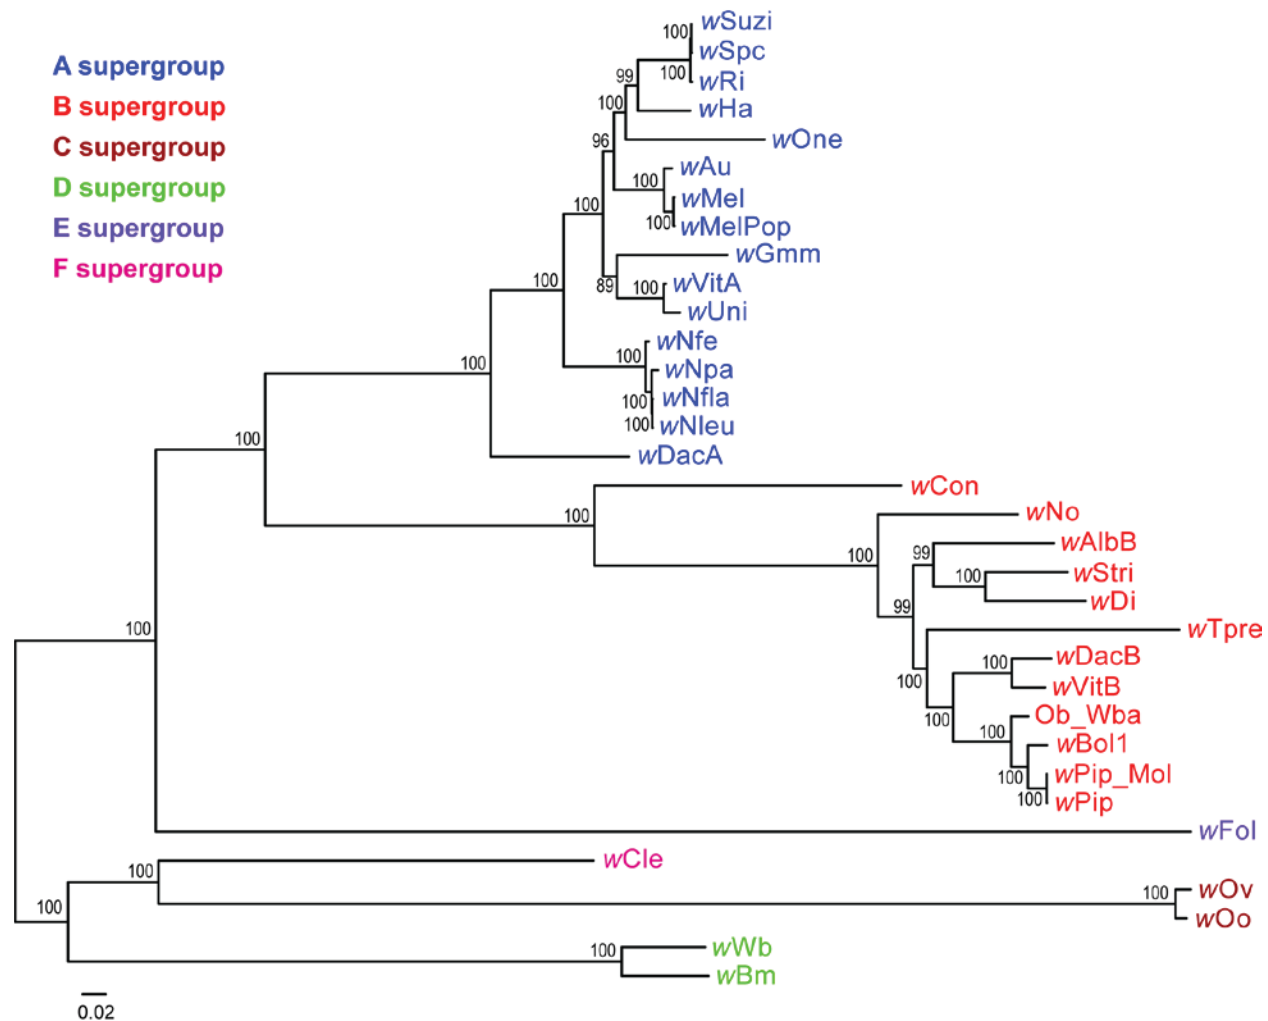

**Figure S2. Allele-specific pyrosequencing for *Wolbachia* strain typing in genome sequenced *N. oneida* and the wild strain CAR262L.**

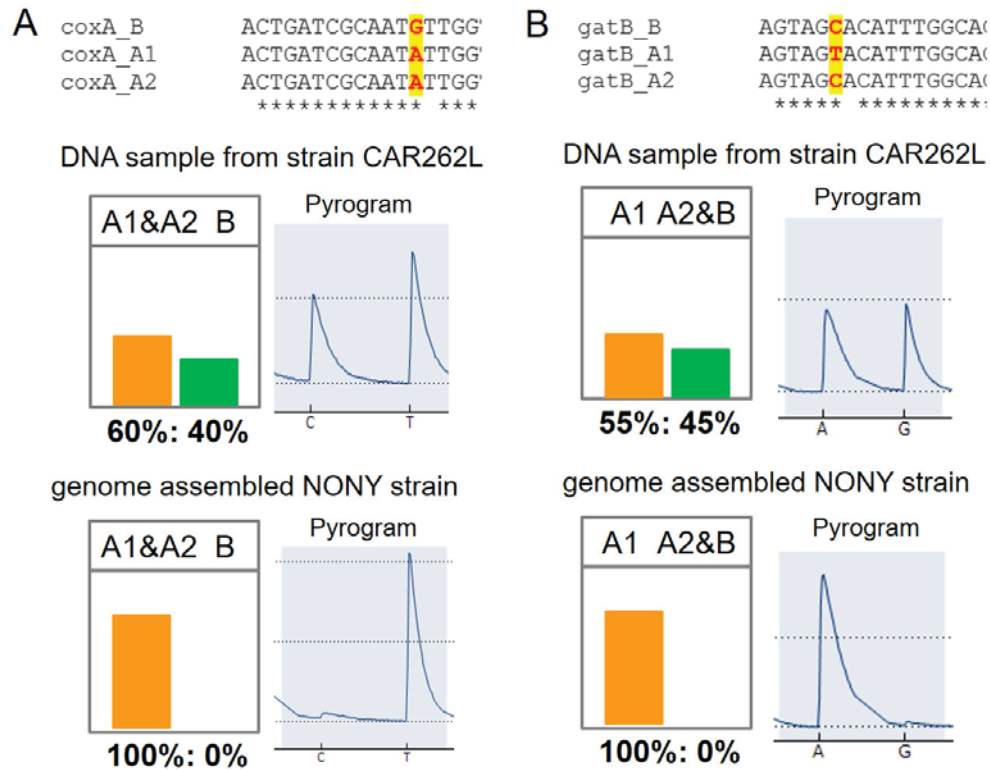

**Figure S3. Alternative allele frequency of SNPs identified in *w*One genome.**

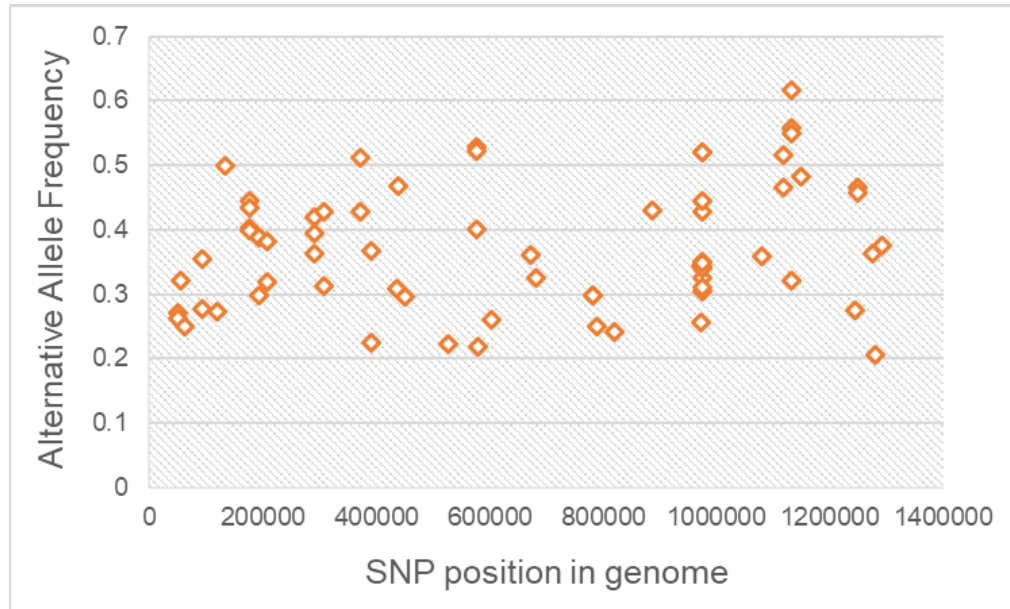

**Figure S4. Enriched GO terms of genes with identified SNPs in the *w*One genome.**

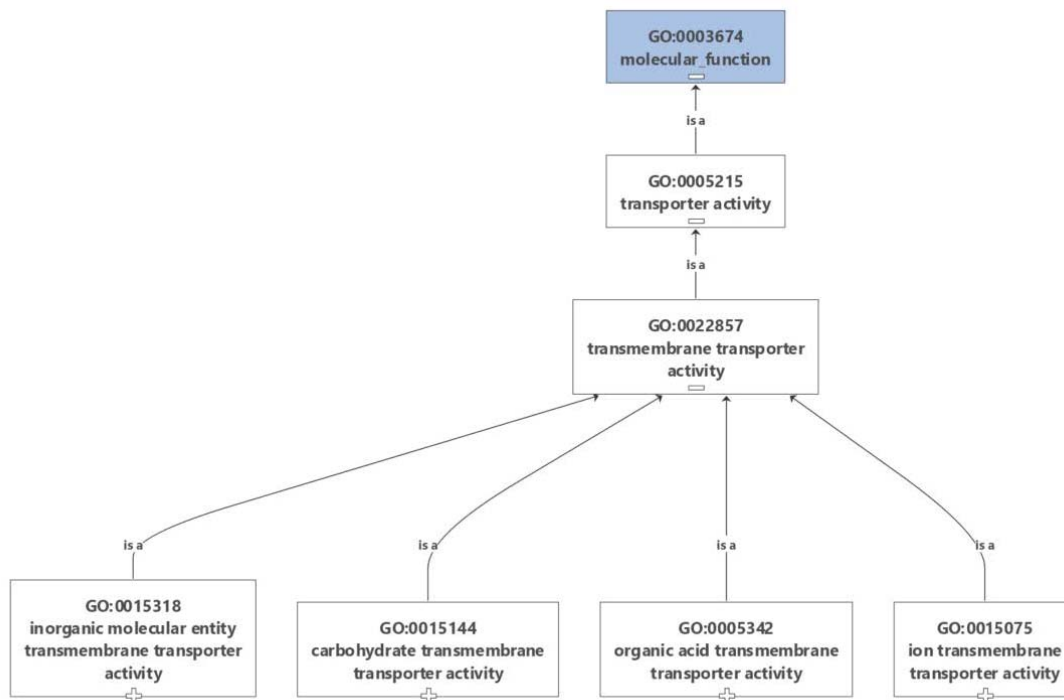



**Figure S5. Correlation of evolutionary divergence estimated by core gene set and concatenated five MLST genes.**

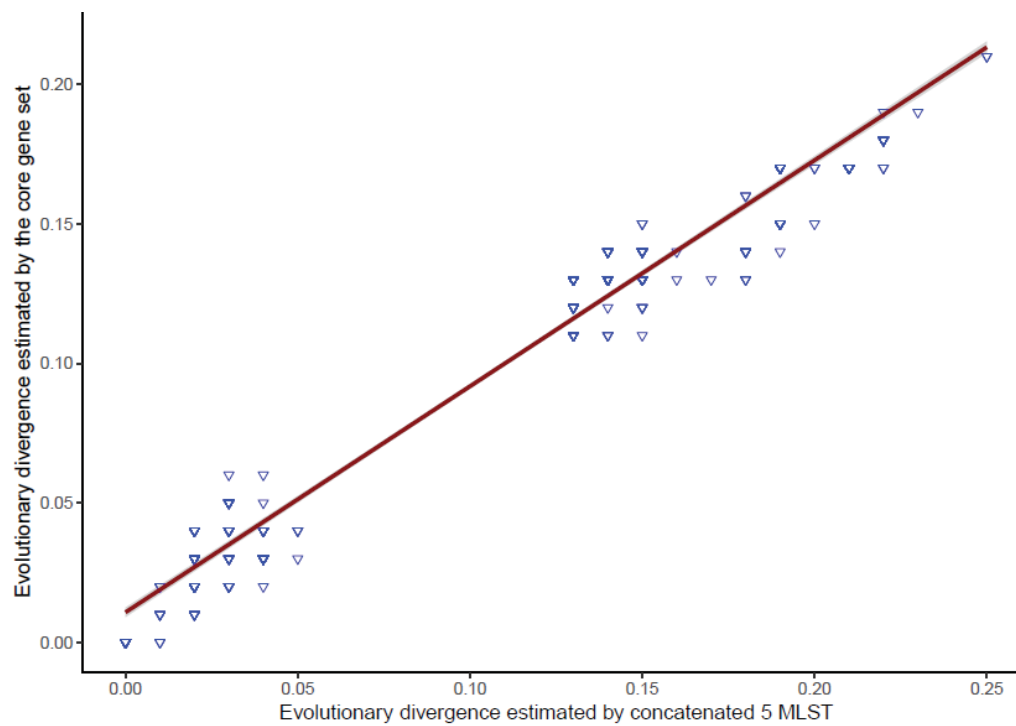

Source: https://www.biorxiv.org/content/10.1101/508408v2.full.pdf
